# Supplementary material for: A novel total synthesis of aculeatin A via a stepwise approach
Source: Royal Society of Chemistry journal article supplement (doi:10.1039/c6ra27140e), 2017-01-01

## Supplementary Information

### **A novel total synthesis of aculeatin A via a stepwise approach**

Zhibin Zhang,<sup>a</sup>XiaoLeng,<sup>b</sup> Shenkun Yang,<sup>a</sup> Cheng Liang,<sup>a</sup> Shuangping Huang\*<sup>a</sup> and Xiaoji Wang\*<sup>c</sup>

<sup>a</sup>School of Pharmacy, Jiangxi Science and Technology Normal University, Fenglin Road 605, Nanchang 330013, China. E-mail: hsping02@gmail.com.

<sup>b</sup>School of Chemistry & Chemical Engineering, Jiangxi Science and Technology Normal University, Fenglin Road 605, Nanchang 330013, China.

<sup>c</sup>School of Life Science, Jiangxi Science and Technology Normal University, Fenglin Road 605, Nanchang 330013, China. E-mail: 2012207455@tju.edu.cn.

### **Table of contents**

|                         |       |
|-------------------------|-------|
| 1. Experimental section | 2-4   |
| 2. NMR spectra          | 5-15  |
| 3. IR spectra           | 16-21 |
| 4. HRMS spectra         | 22-25 |

## 1. Experimental section

### Synthetic general method

All reactions were carried out under N<sub>2</sub> atmosphere with dry solvents unless otherwise noted and monitored by thin-layer chromatography (TLC) carried out on 0.25 mm silica gel plates (60F-254). Silica gel (200-300 mesh) supplied by Qingdao Marine chemical factory in China was used for flash column chromatography. Anhydrous THF was distilled from sodium-benzophenone. CH<sub>2</sub>Cl<sub>2</sub> and DMF were distilled from CaH<sub>2</sub>. Other solvents or reagents weren't purified. Yield refers to chromatographically and spectroscopically (<sup>1</sup>H, <sup>13</sup>C NMR), unless otherwise stated. NMR spectra were recorded on either a 400 MHz spectrometers (<sup>1</sup>H: 400 MHz, <sup>13</sup>C: 100 MHz) or 500MHz (<sup>1</sup>H: 500 MHz, <sup>13</sup>C: 125 MHz). High-resolution mass spectra were obtained from a MALDI-TOF Mass Spectrometer. IR spectra were recorded on a shimadzu FT-IR spectrophotometer. Optical rotations were measured on a digital polarimeter in CHCl<sub>3</sub> at 25 °C.

**(R)-1-((S)-4-benzyl-2-thioxothiazolidin-3-yl)-3-hydroxyhexadecan-1-one (7)**

To a stirred solution of compound **5** (4.00 g, 15.91 mmol, 1.0 equiv.) in dry CH<sub>2</sub>Cl<sub>2</sub> (150 mL) was added dropwise TiCl<sub>4</sub> (16.70 mL, 16.70 mmol, 1 M in CH<sub>2</sub>Cl<sub>2</sub>, 1.05 equiv.) at 0°C under N<sub>2</sub>. After 15 min, DIPEA (2.26 g, 17.50 mmol, 1.1 equiv.) was added to the solution slowly. After another 40 min, the solution was treated with NMP (3.10 mL, 31.82 mmol, 2.0 equiv.) at the same temperature. 10 minutes later, aldehyde **6** (3.70 g, 17.50 mmol, 1.1 equiv.) in dry CH<sub>2</sub>Cl<sub>2</sub> (10 mL) was added to the solution via a cannula. The solution was stirred for 2 h at 0°C and then quenched with saturated NH<sub>4</sub>Cl solution. The organic layer was separated and the aqueous layer was extracted by CH<sub>2</sub>Cl<sub>2</sub> (100 mL × 3). The combined organic solution was washed with sat. NaCl solution, dried over anhydrous Na<sub>2</sub>SO<sub>4</sub>, filtered and concentrated under reduced pressure. The residue was purified through flash chromatography (Hexane/EtOAc = 20:1) to yield the product **7** (4.46g) and its diastereoisomer **8**

(0.18g) as colorless oils (65%, dr = 93:7). **7**: [α]<sub>D</sub> = 204.4 (c 2.8, CHCl<sub>3</sub>). <sup>1</sup>H NMR (500 MHz, CDCl<sub>3</sub>): δ 7.36-7.33 (m, 2H), 7.30-7.27 (m, 3H), 5.43-5.38 (m, 1H), 4.19-4.11 (m, 1H), 3.64 (d, *J* = 17.5 Hz, 1H), 3.41 (dd, *J* = 11.5, 7.5 Hz, 1H), 3.23 (dd, *J* = 13.0, 3.5 Hz, 1H), 3.14 (dd, *J* = 17.5, 9.5 Hz, 1H), 3.05 (t, *J* = 11.8 Hz, 1H), 2.89 (d, *J* = 11.5 Hz, 1H), 2.64 (br, 1H, OH), 1.59-1.56 (m, 1H), 1.50-1.48 (m, 1H), 1.29-1.21 (m, 22H), 0.89 (t, *J* = 6.7 Hz, 3H); <sup>13</sup>C NMR (100 MHz, CDCl<sub>3</sub>): δ 201.3, 173.2, 136.3, 129.3, 128.8, 127.2, 68.2, 67.8, 45.8, 36.7, 36.3, 32.0, 31.8, 29.6-29.5 (br, 7C), 29.3, 25.5, 22.6, 14.1; IR (film): 3427, 2924, 2853, 1695, 1455, 1363, 1343, 1292, 1262, 1192, 1164, 1138, 1044, 746, 701 cm<sup>-1</sup>;

HRMS (ESI): *m/z* calcd. for C<sub>26</sub>H<sub>42</sub>NO<sub>2</sub>S<sub>2</sub> [M+H]<sup>+</sup> 464.2651, found 464.2650.

Diastereoisomer of **7**: [α]<sub>D</sub> = 98.8 (c 2.7, CHCl<sub>3</sub>). <sup>1</sup>H NMR (500 MHz, CDCl<sub>3</sub>): δ 7.37-7.34 (m, 2H), 7.30-7.27 (m, 3H), 5.44-5.40 (m, 1H), 4.08-4.06 (m, 1H), 3.46 (d, *J* = 17.5, 9.3 Hz 1H), 3.41 (dd, *J* = 11.5, 7.3 Hz, 1H), 3.35 (dd, *J* = 17.5, 2.5 Hz, 1H), 3.24 (dd, *J* = 13.0, 4.0 Hz, 1H), 3.05 (dd, *J* = 13.0, 10.5 Hz, 1H), 2.91 (d, *J* = 11.5 Hz, 1H), 2.73 (br, 1H, OH), 1.60-1.58 (m, 1H), 1.51-1.47 (m, 1H), 1.32-1.27 (m, 22H), 0.89 (t, *J* = 6.9 Hz, 3H); <sup>13</sup>C NMR (100 MHz, CDCl<sub>3</sub>): δ 201.4, 173.8, 136.3, 129.4, 128.9, 127.2, 68.4, 68.2, 45.5, 36.7, 36.6, 32.0, 31.9, 29.6-29.5 (br, 7C), 29.3, 25.4, 22.6, 14.1; IR (film): 3427, 2924, 2853, 1699, 1683, 1496, 1467, 1455, 1343, 1294, 1262, 1164, 1138, 1040, 773,

701  $\text{cm}^{-1}$ ; HRMS (ESI):  $m/z$  calcd. for  $\text{C}_{26}\text{H}_{42}\text{NO}_2\text{S}_2$   $[\text{M}+\text{H}]^+$  464.2651, found 464.2650.

### **(R)-3-hydroxy-N-methoxy-N-methylhexadecanamide (8)**

At  $0^\circ\text{C}$ , to a solution of compound **7** (0.16 g, 0.35 mmol, 1.0 equiv.) in anhydrous DCM (1.7 mL) was added MeONHMe•HCl (0.14g, 1.38 mmol, 4.0 equiv.) and imidazole (0.12 g, 1.73 mmol, 5.0 equiv.). Then the resultant mixture was stirred overnight at room temperature. The reaction was quenched with saturated  $\text{NH}_4\text{Cl}$  and extracted with EtOAc (5 mL  $\times$  3). The combined organic solution was washed with sat. aq. NaCl, dried over sodium sulfate, filtered and concentrated in vacuum. The residue was purified with flash chromatography (Hexane/EtOAc = 8:1) to provide compound **8** (0.087 g, 80%) as a colorless oil.  $^1\text{H}$  NMR (400 MHz,  $\text{CDCl}_3$ ):  $\delta$  4.02-3.98 (m, 1H), 3.67 (s, 3H), 3.18 (s, 3H), 2.64 (d,  $J$  = 16.4 Hz, 1H), 2.43 (dd,  $J$  = 16.6, 9.4 Hz, 1H), 1.57-1.53 (m, 1H), 1.43-1.41 (m, 1H), 1.29-1.21 (m, 22H), 0.86 (t,  $J$  = 6.8 Hz, 3H);  $^{13}\text{C}$  NMR (100 MHz,  $\text{CDCl}_3$ ):  $\delta$  173.9, 67.8, 61.2, 38.1, 36.5, 31.8, 31.8, 29.6-29.5 (br, 7C), 29.3, 25.5, 22.6, 14.0; IR (film): 3439, 2924, 2854, 2361, 1648, 1466, 1276, 1180, 999, 749  $\text{cm}^{-1}$ ; HRMS (ESI):  $m/z$  calcd. for  $\text{C}_{18}\text{H}_{38}\text{NO}_3^+$   $[\text{M}+\text{H}]^+$ : 316.2846, found 316.2850.

### **(R)-3-((tert-butyldimethylsilyl)oxy)-N-methoxy-N-methylhexadecanamide (9)**

At  $0^\circ\text{C}$ , to a solution of compound **8** (87 mg, 0.28 mmol, 1.0 equiv.) and imidazole (75 mg, 1.10 mmol, 4.0 equiv.) in anhydrous DCM (1.7 mL) was added slowly the solution of TBSCl (95mg, 0.63mmol, 2.3equiv) in DCM. The mixture was then stirred overnight at room temperature. When TLC monitor indicated compound **8** was consumed, the reaction was quenched with sat.  $\text{NH}_4\text{Cl}$  solution and extracted with DCM (5 mL  $\times$  3). The combined organic layer was washed with sat. NaCl solution, dried over sodium sulfate, filtered and concentrated in vacuum. The residue was purified with flash chromatography (Hexane/EtOAc = 25:1) to give the desired product **9** as a colorless oil (98mg, 83%).  $^1\text{H}$  NMR (400 MHz,  $\text{CDCl}_3$ ): 4.24-4.18 (m, 1H), 3.68 (s, 3H), 3.16 (s, 3H), 2.70 (dd,  $J$  = 14.1, 7.2 Hz, 1H), 2.37 (dd,  $J$  = 14.6, 5.2 Hz, 1H), 1.49-1.45 (m, 2H), 1.30-1.21 (m, 22H), 0.87 (t,  $J$  = 6.8 Hz, 3H), 0.85 (s, 9H), 0.05 (s, 3H), 0.02 (s, 3H);  $^{13}\text{C}$  NMR (125 MHz,  $\text{CDCl}_3$ ):  $\delta$  172.6,

69.5, 61.2, 39.6, 37.9, 31.9, 29.7-29.6 (br, 7C), 29.3, 25.8, 25.0, 22.6, 18.0, 14.0, -4.7, -4.7; IR (film): 2927, 2855, 2360, 1676, 1462, 1388, 1256, 1096, 1005, 836, 776, 749  $\text{cm}^{-1}$ ; HRMS (ESI):  $m/z$  calcd. for  $\text{C}_{24}\text{H}_{52}\text{NO}_3\text{Si}^+$   $[\text{M}+\text{H}]^+$ : 430.3711, found 430.3711.

**(*R*)-3-hydroxyhexadecanoic acid (11)**

The preparation of acid **11** was following that of compound **14**. Yield: 70%.

$^1\text{H}$  NMR (500 MHz,  $\text{CDCl}_3$ ):  $\delta$  4.09-4.01 (m, 1H), 2.58 (dd,  $J = 16.6, 2.7$  Hz, 1H), 2.48 (dd,  $J = 16.6, 9.0$  Hz, 1H), 1.57-1.55 (m, 1H), 1.48-1.45 (m, 2H), 1.29-1.21 (m, 21H), 0.89 (t,  $J = 6.8$  Hz, 3H);  $^{13}\text{C}$  NMR (125 MHz,  $\text{CDCl}_3$ ): 177.0, 68.1, 41.0, 36.6, 31.9, 29.70-29.50 (br, 7C), 29.3, 25.4, 22.7, 14.1; IR (film): 2913, 2847, 1681, 1470, 1411, 1392, 1223, 1074, 1018, 874, 719, 547  $\text{cm}^{-1}$ ; HRMS (ESI):  $m/z$  calcd. for  $\text{C}_{16}\text{H}_{32}\text{O}_3\text{Na}^+$   $[\text{M}+\text{Na}]^+$ : 295.2244, found 295.2230.



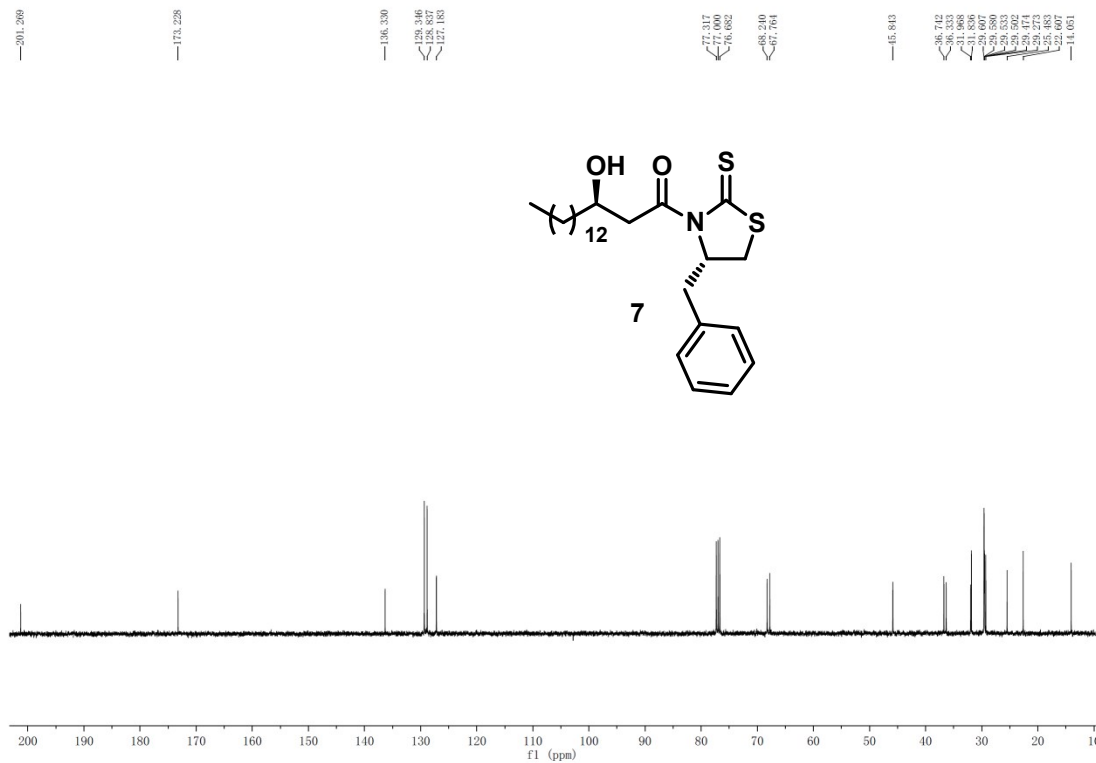

Compound 7-diastereoisomer:

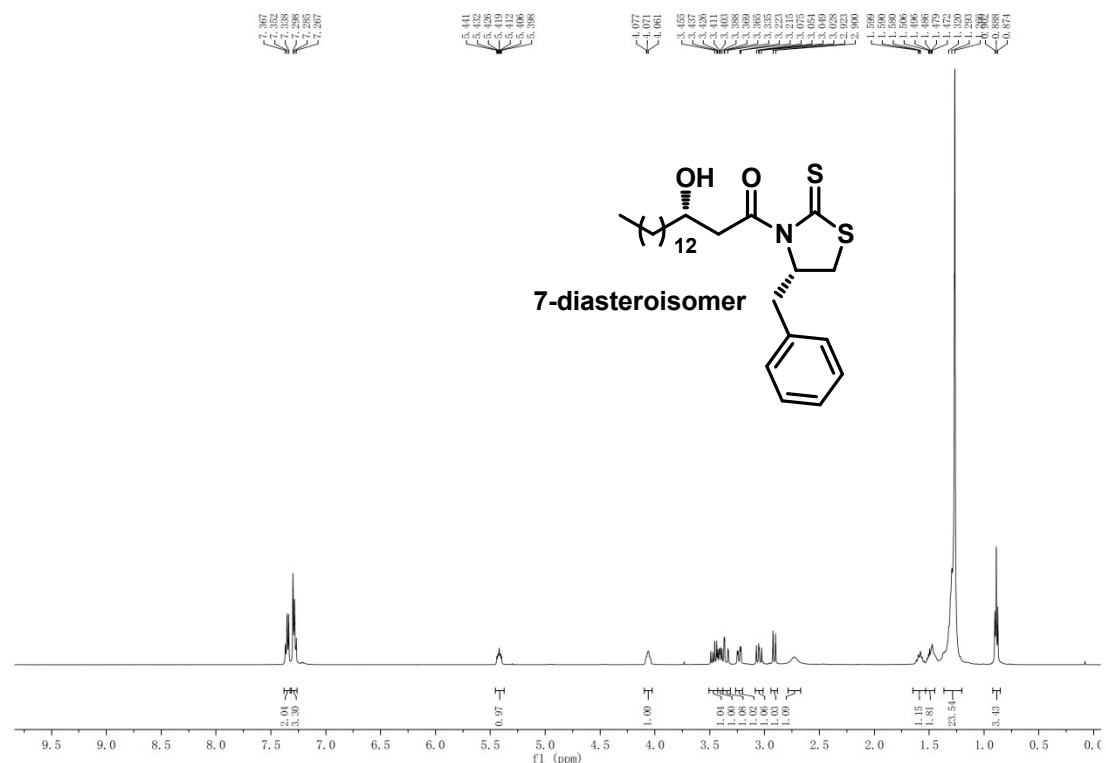

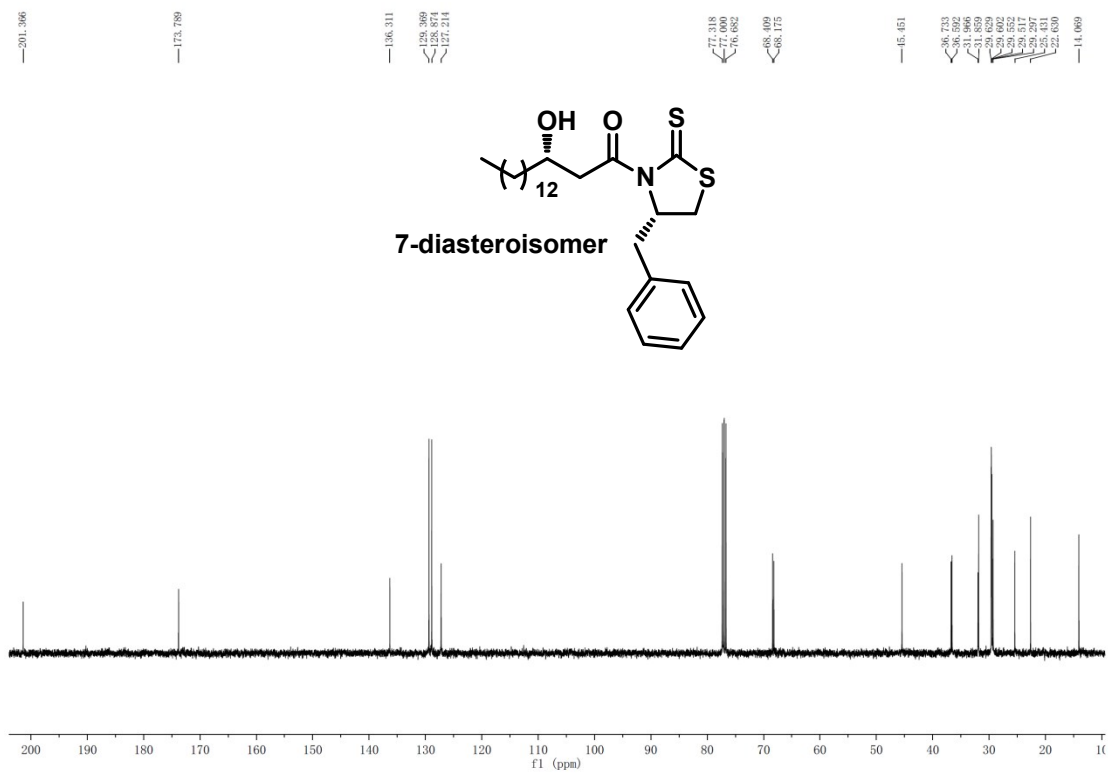

Compound 8:



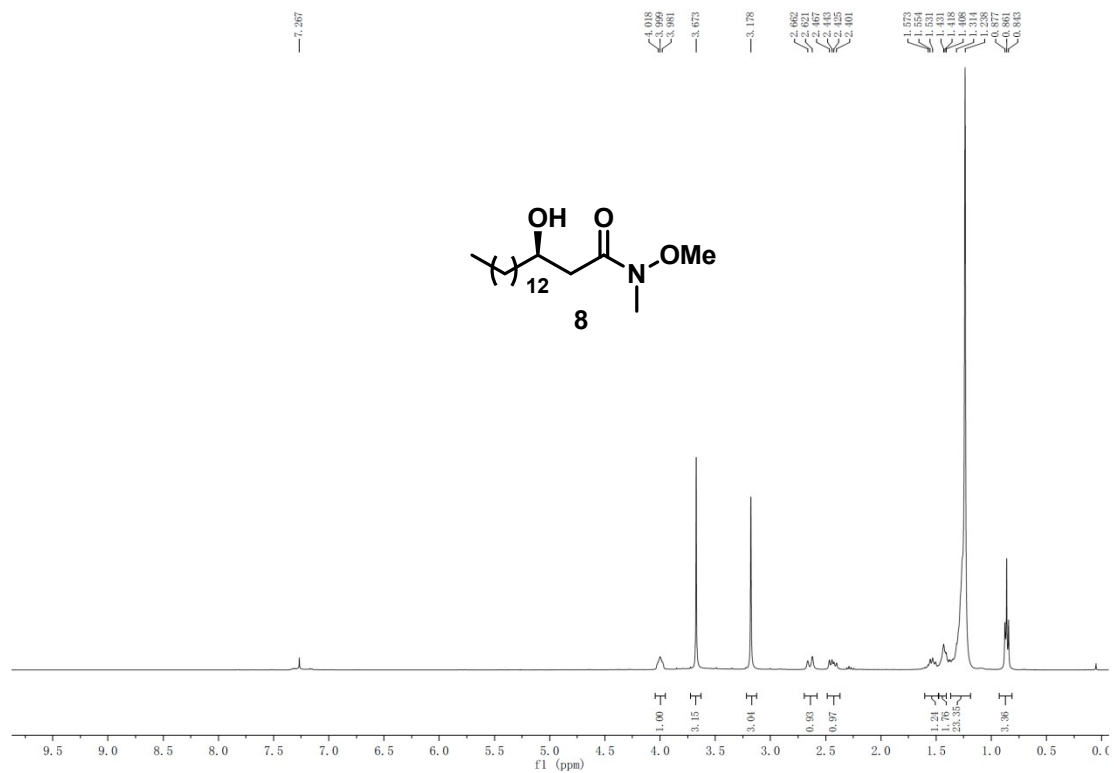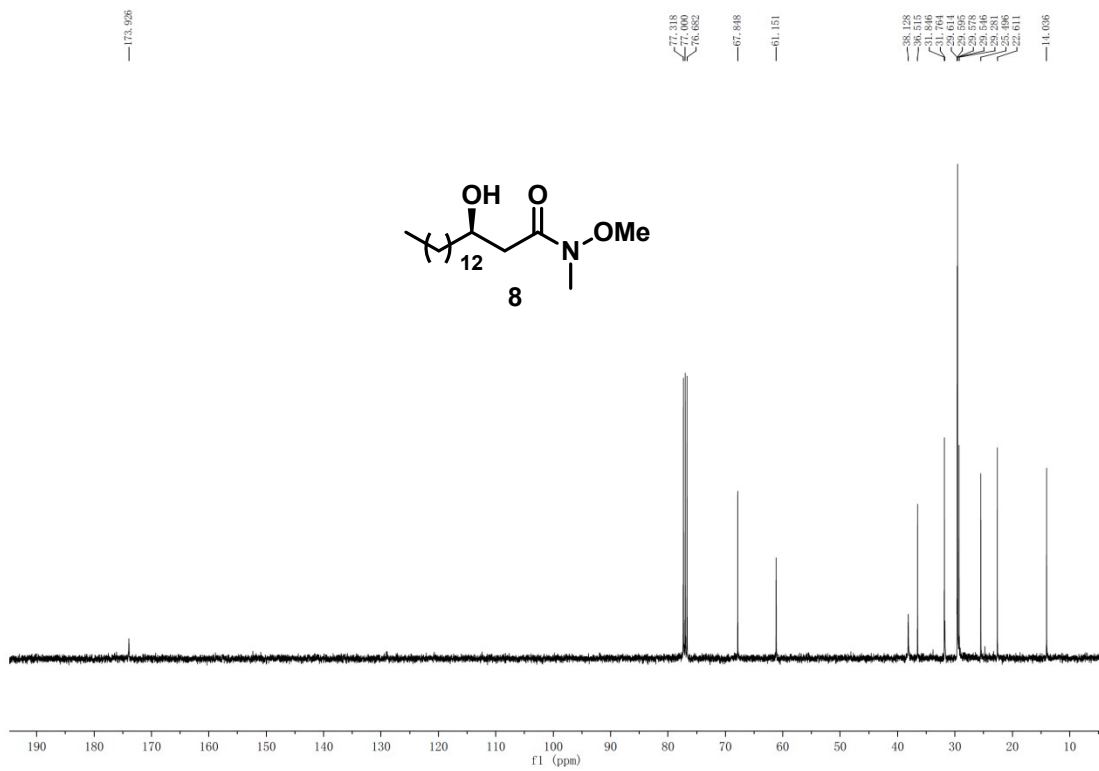

Compound 9:

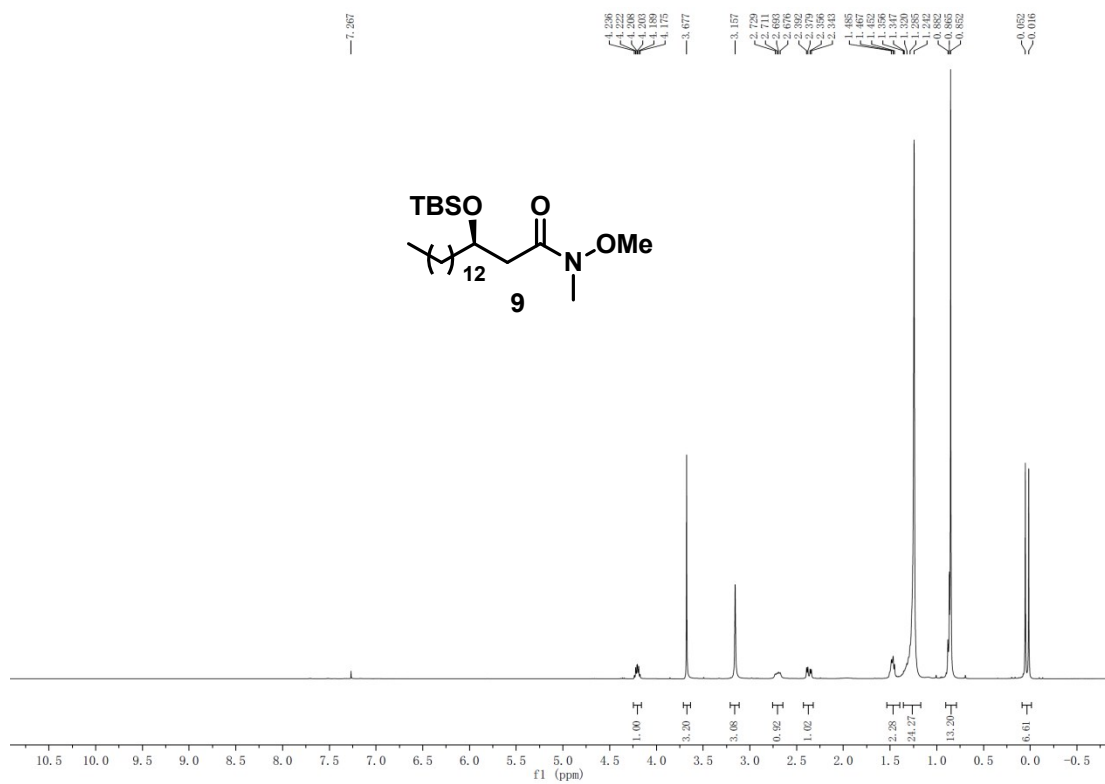

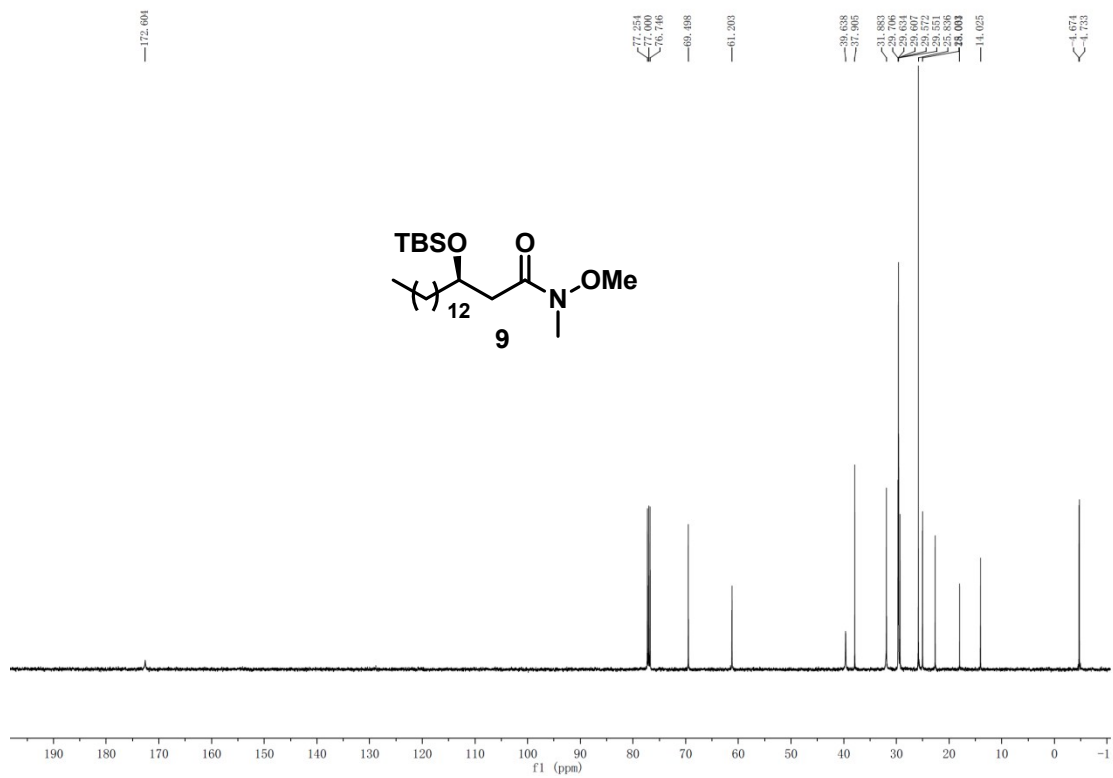

Compound 11:

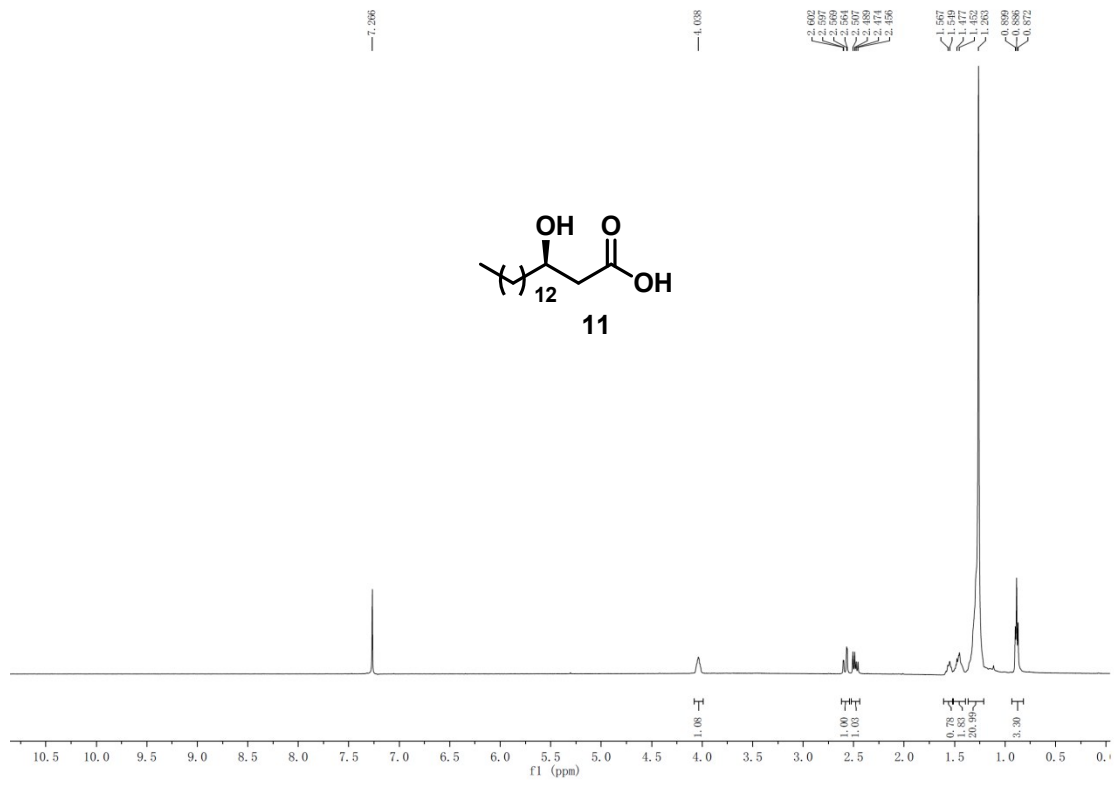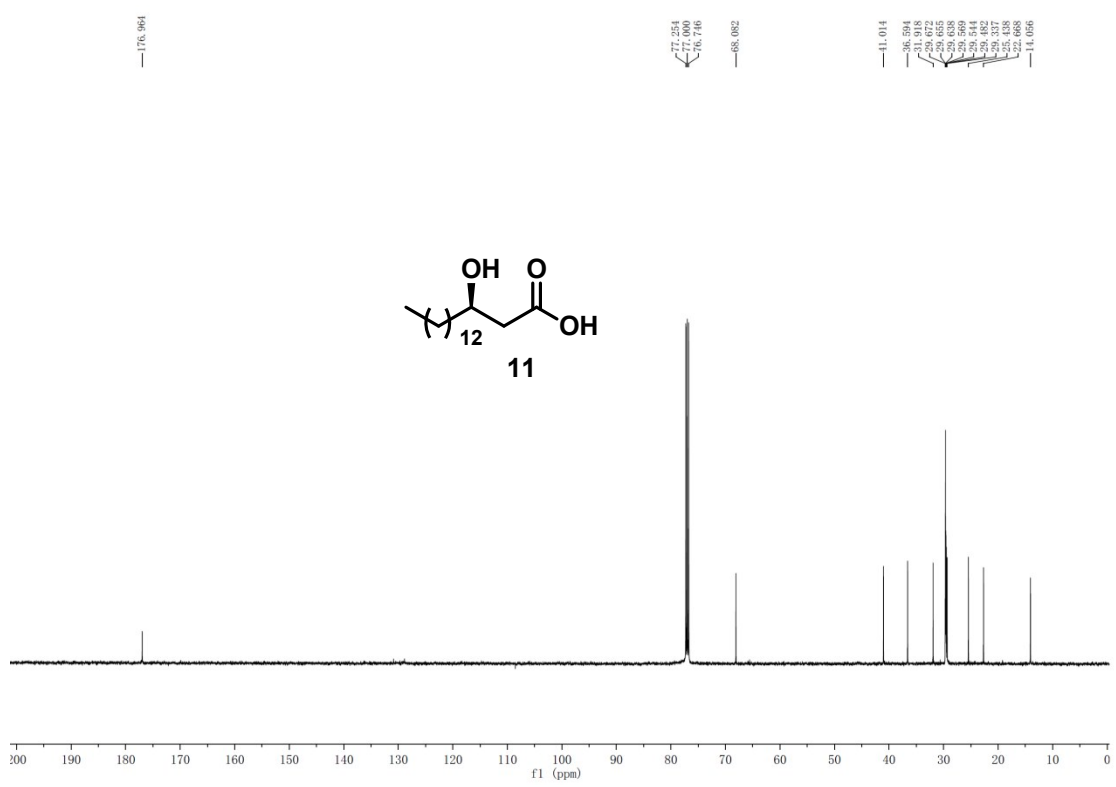

Compound 13:

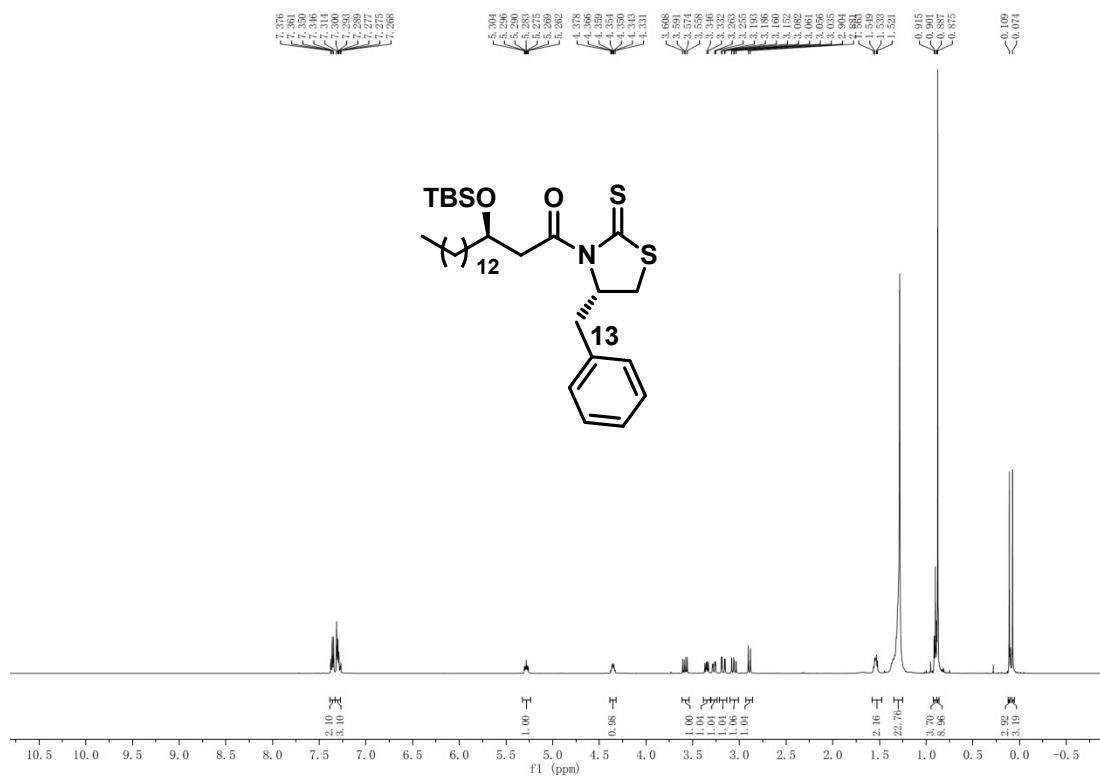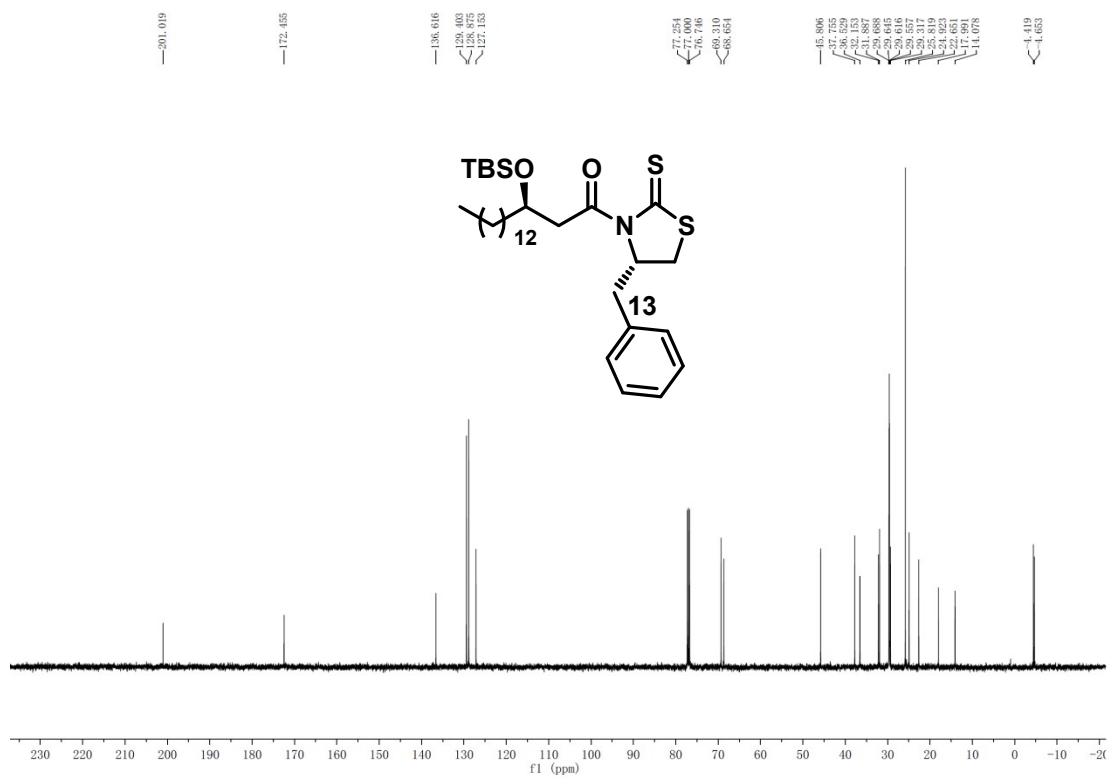

Compound 14:

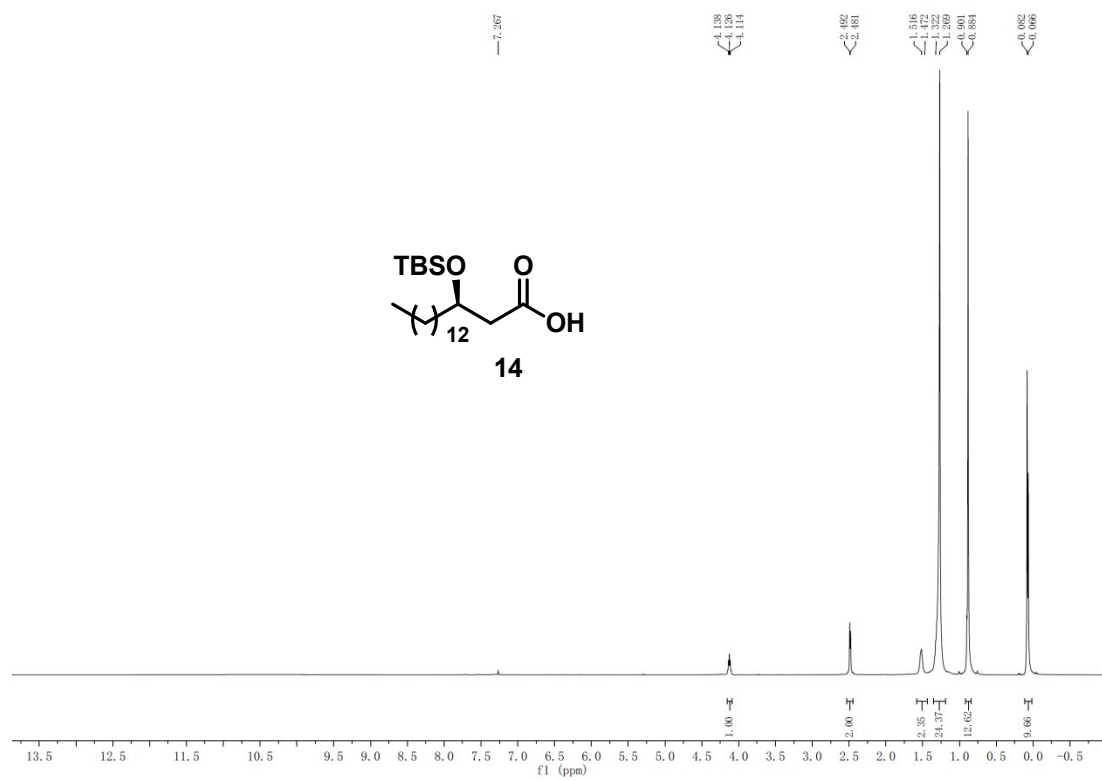

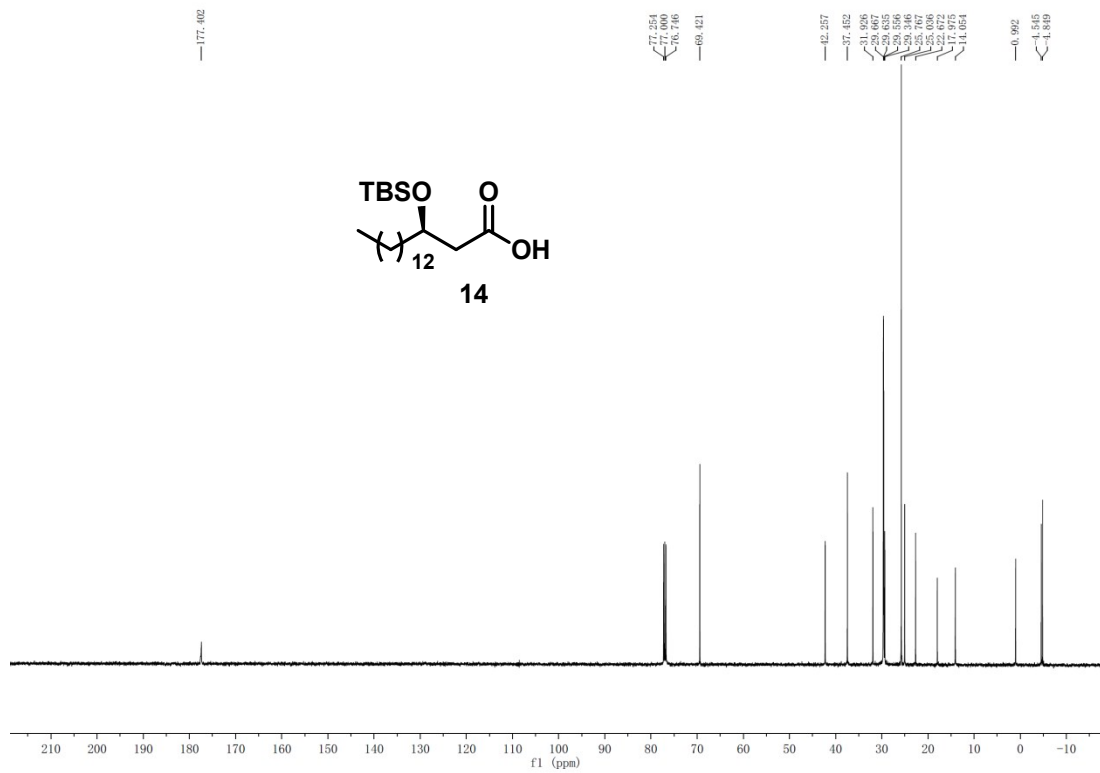

Compound 4:

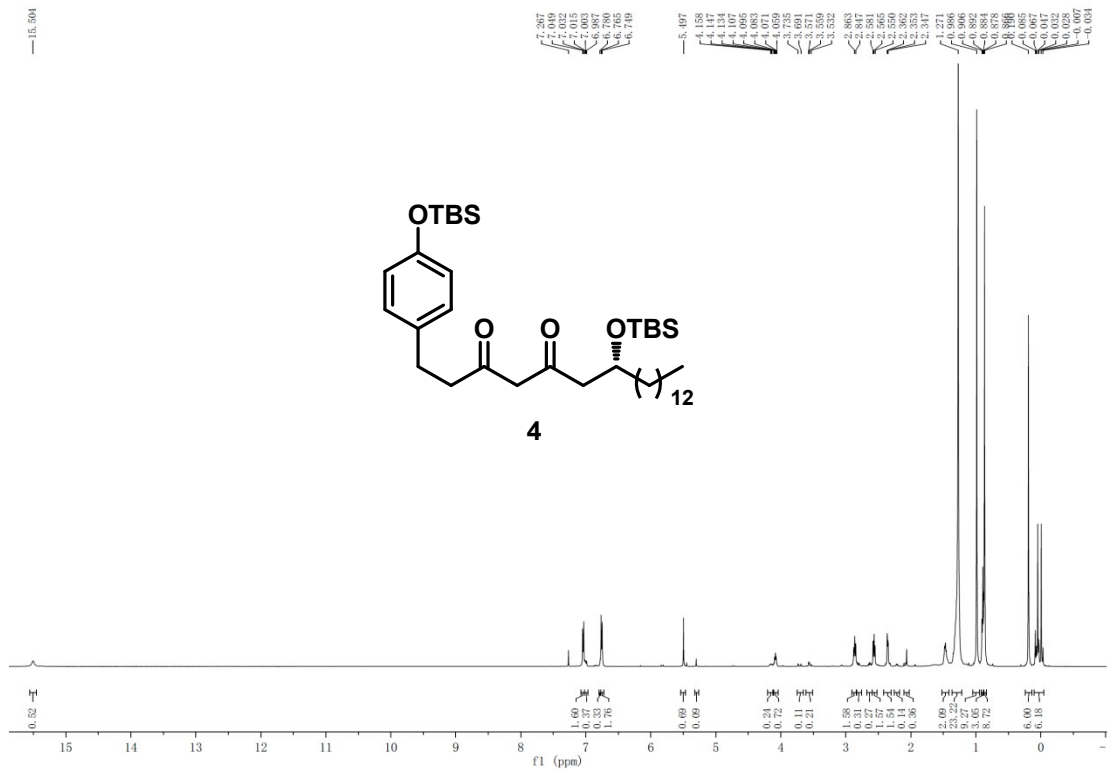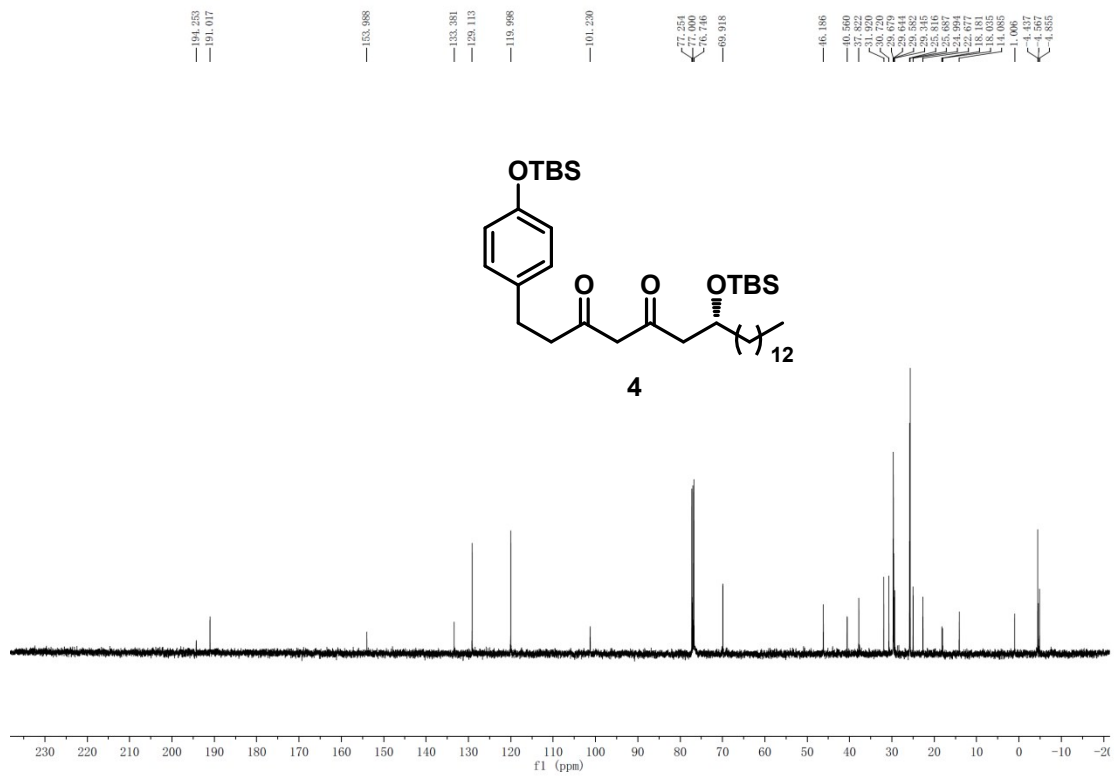



Compound 3:

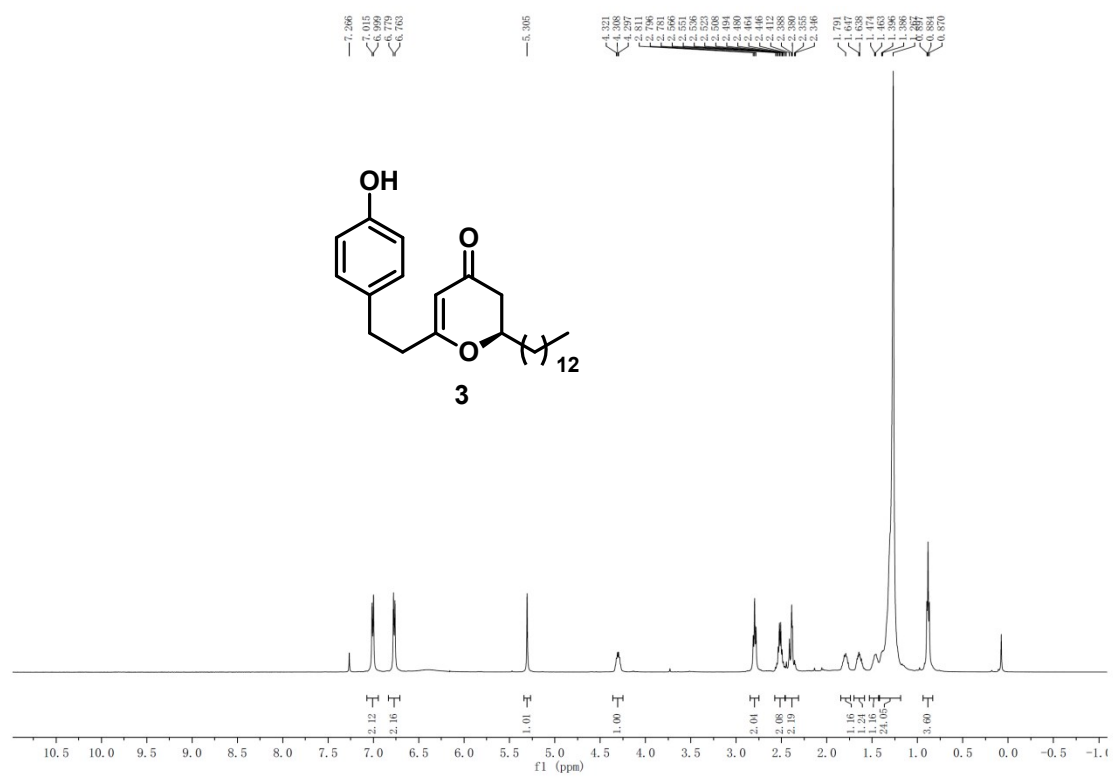

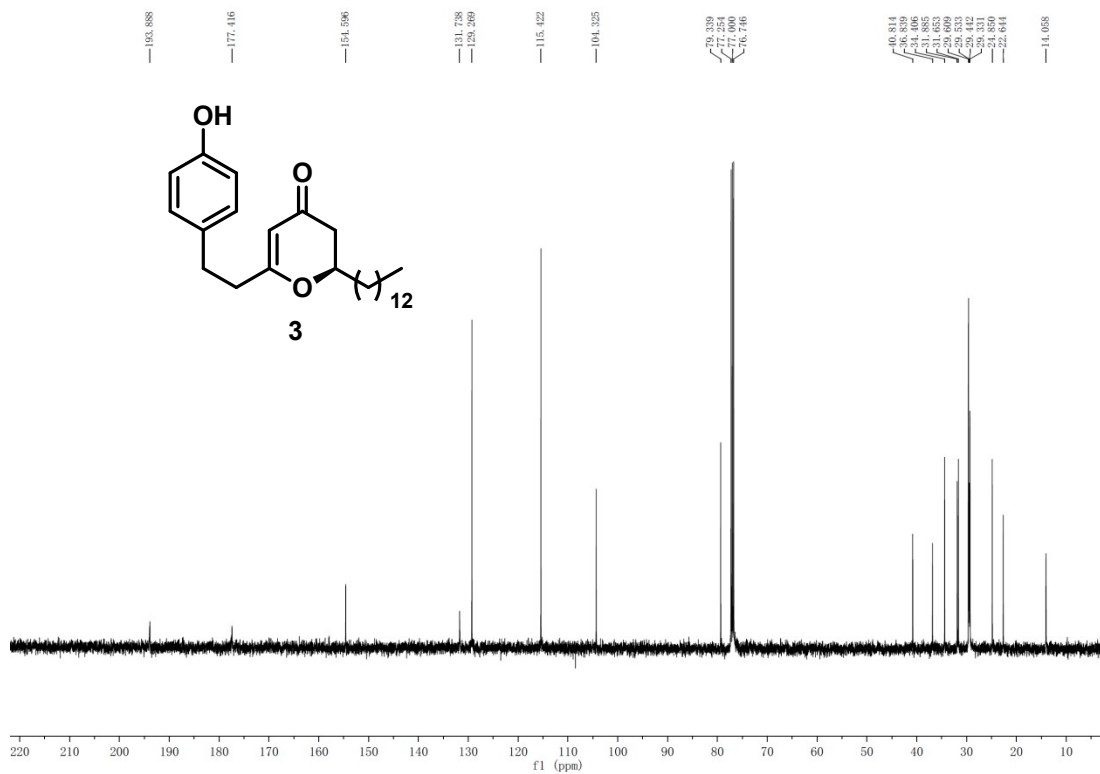

Compound 1:

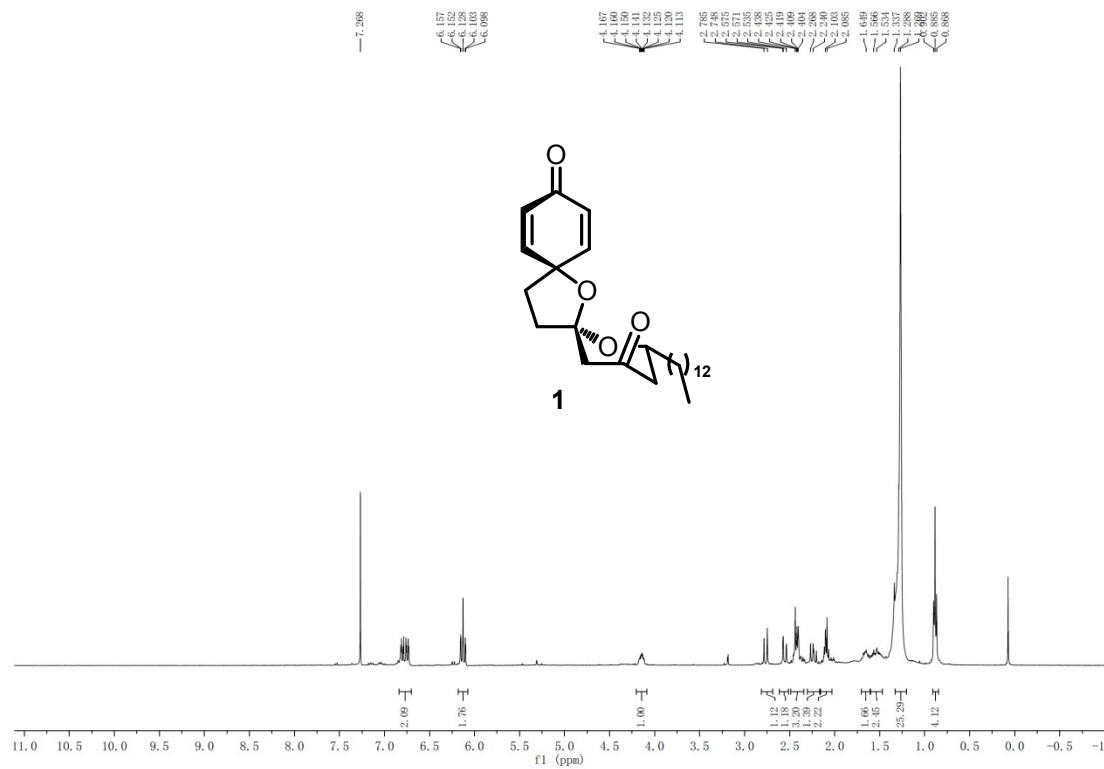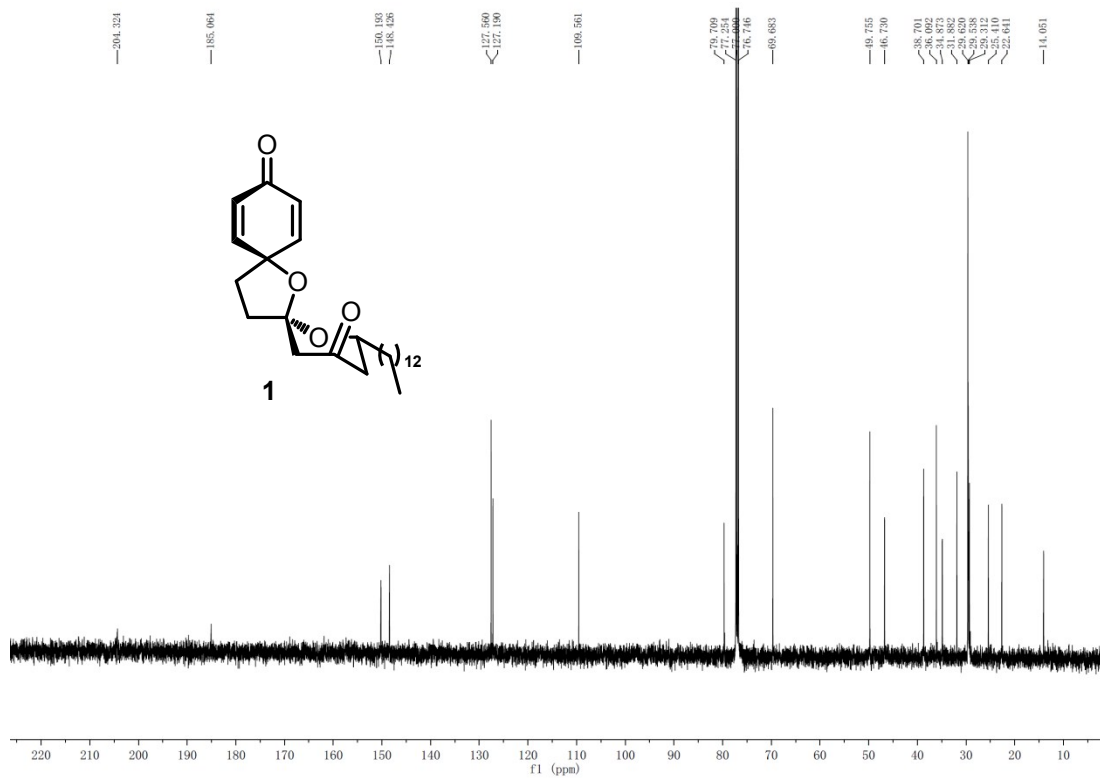

Aculeatin A:

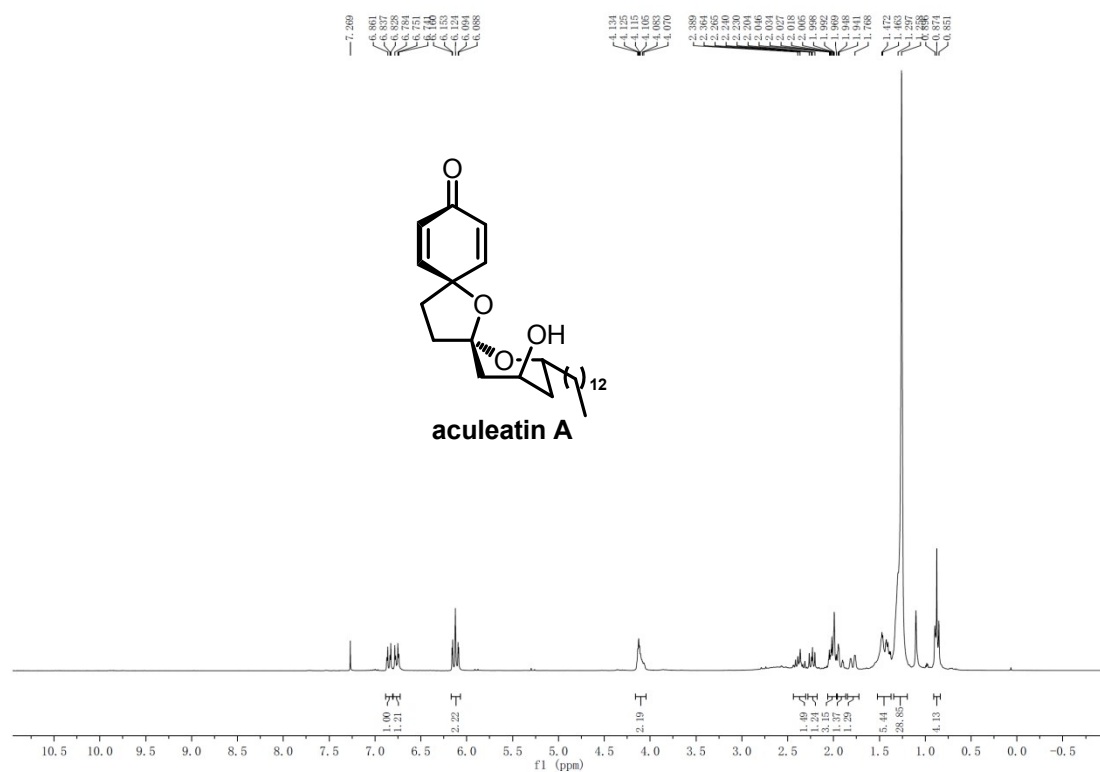

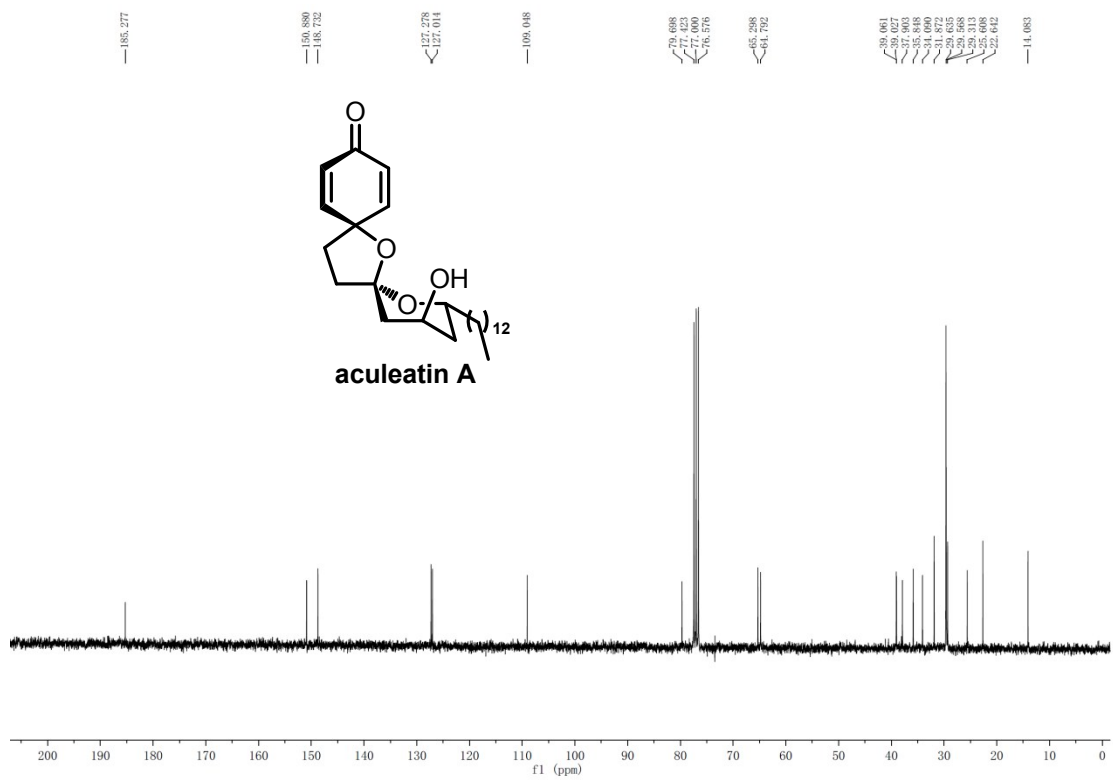

IR spectra:

Compound 7:

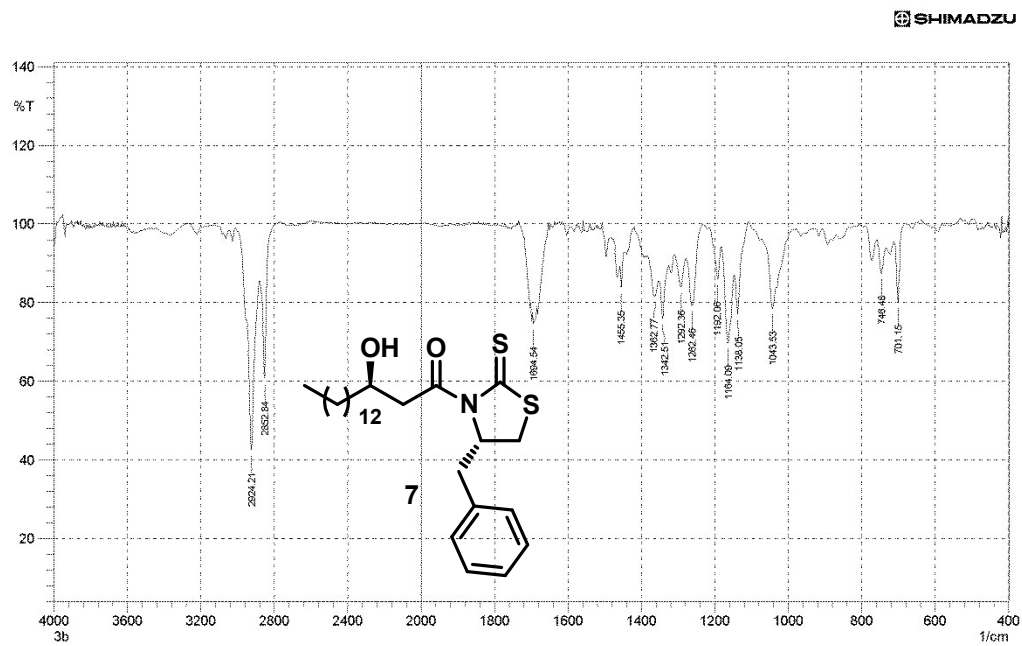

注释:  
3b

扫描次数:  
分辨率:

日期/时间: 2016-7-13 14:16:43  
用户名: Administrator

Compound 7-diastereoisomer:

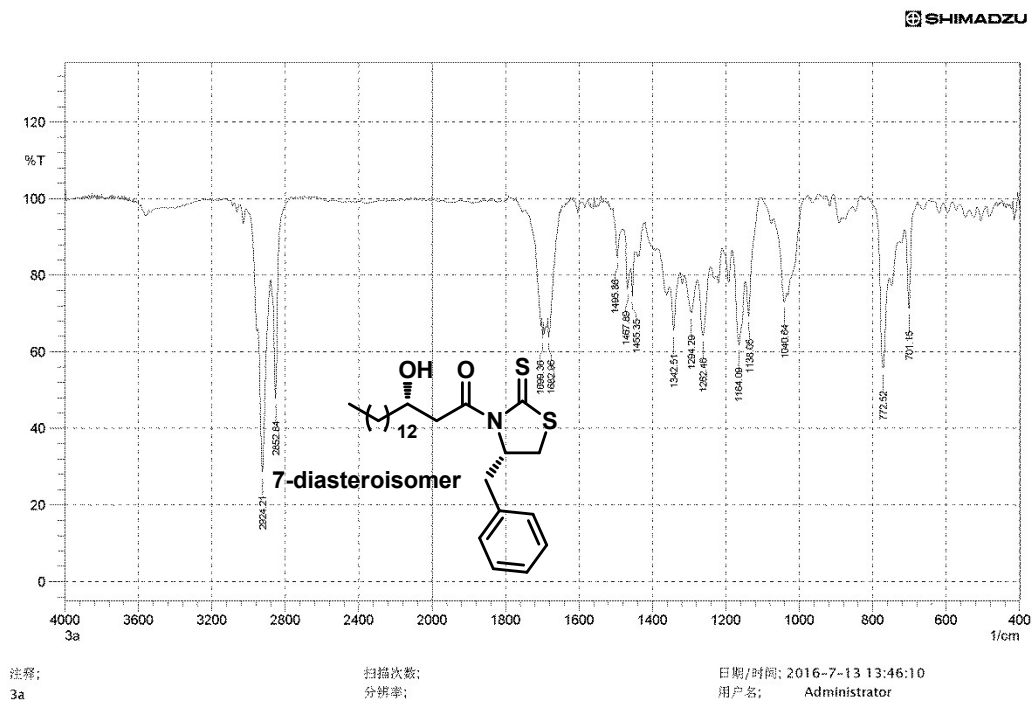

Compound 8:

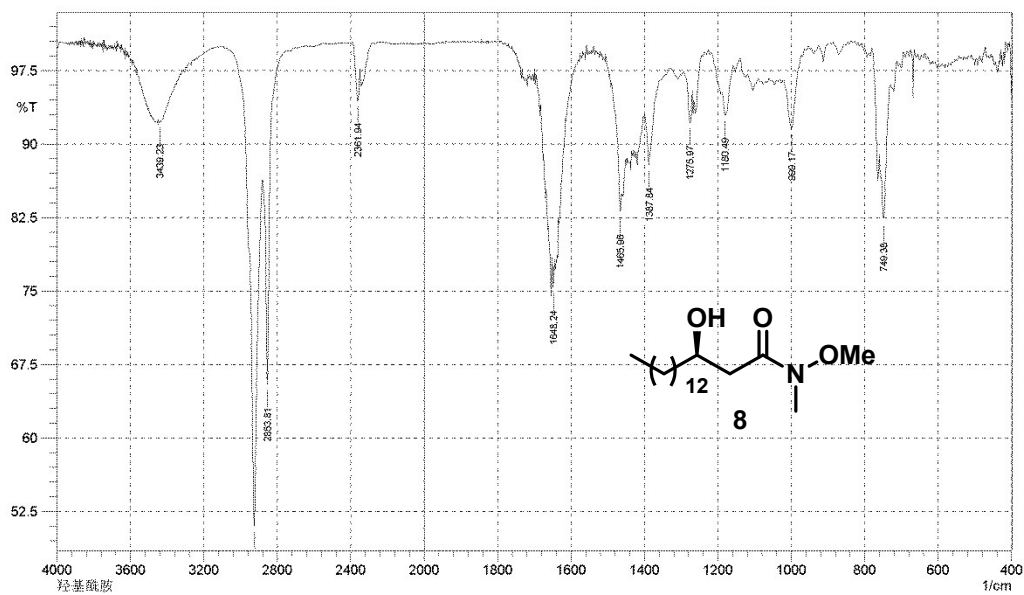

注释:  
サ J-キ

扫描次数:  
分辨率:

日期/时间: 2016-9-20 16:35:23  
用户名: Administrator

### Compound 9:

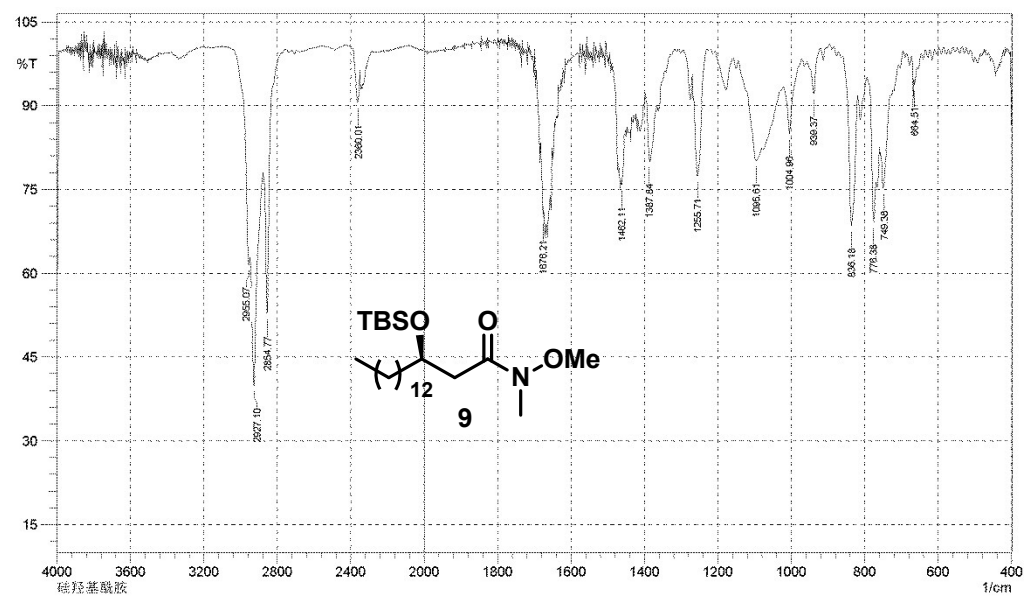

注释:  
ケ酸対 J-キ

扫描次数:  
分辨率:

日期/时间: 2016-9-20 16:51:14  
用户名: Administrator

# Compound 11:

SHIMADZU

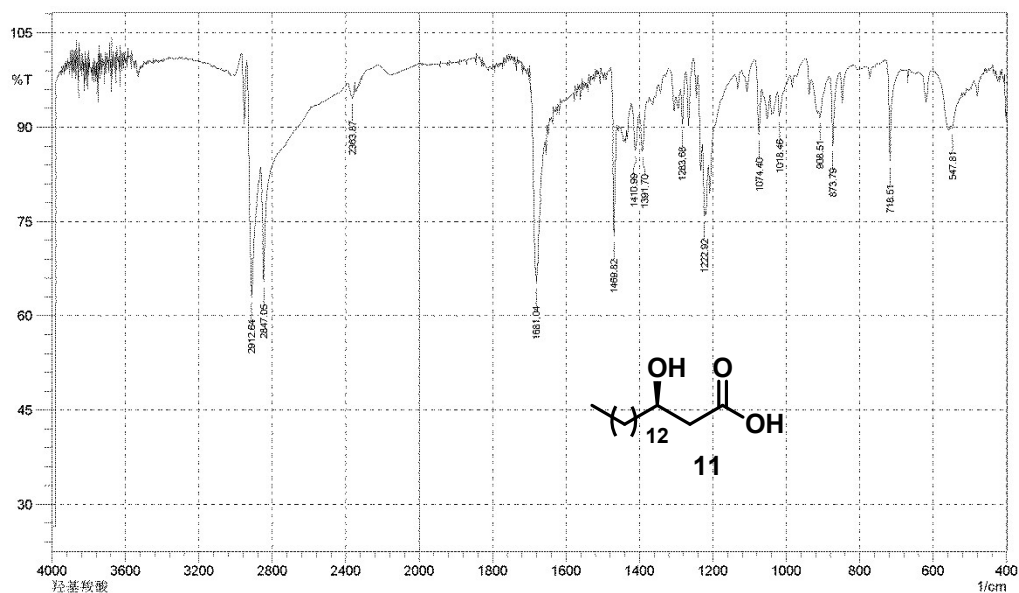

注释:  
サ社

扫描次数:  
分辨率:

日期/时间: 2016-9-20 17:09:36  
用户名: Administrator

# Compound 13:



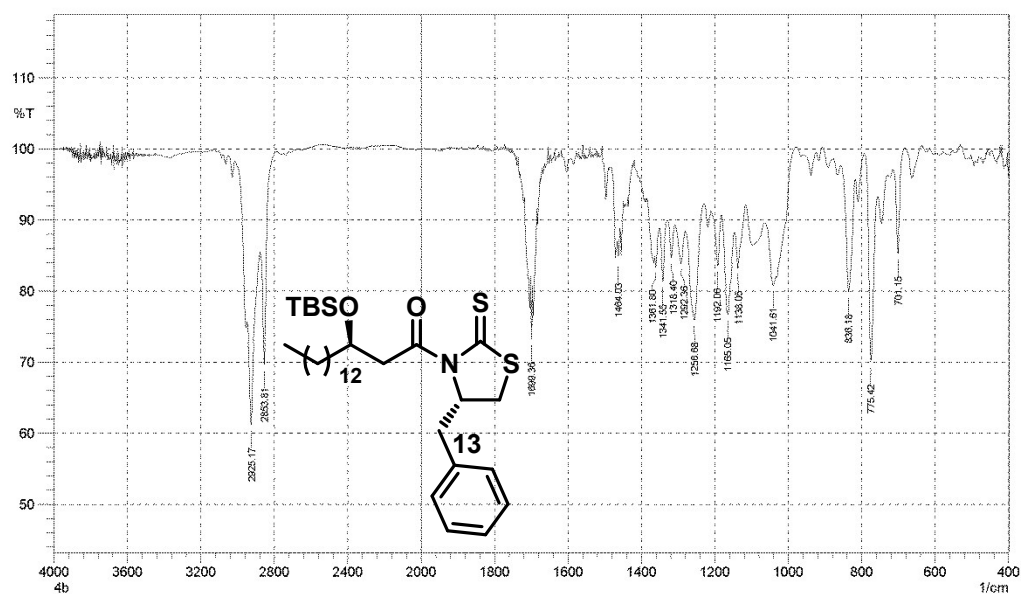

注释:  
4b

扫描次数:  
分辨率:

日期/时间: 2016-7-13 14:40:29  
用户名: Administrator

Compound 14:

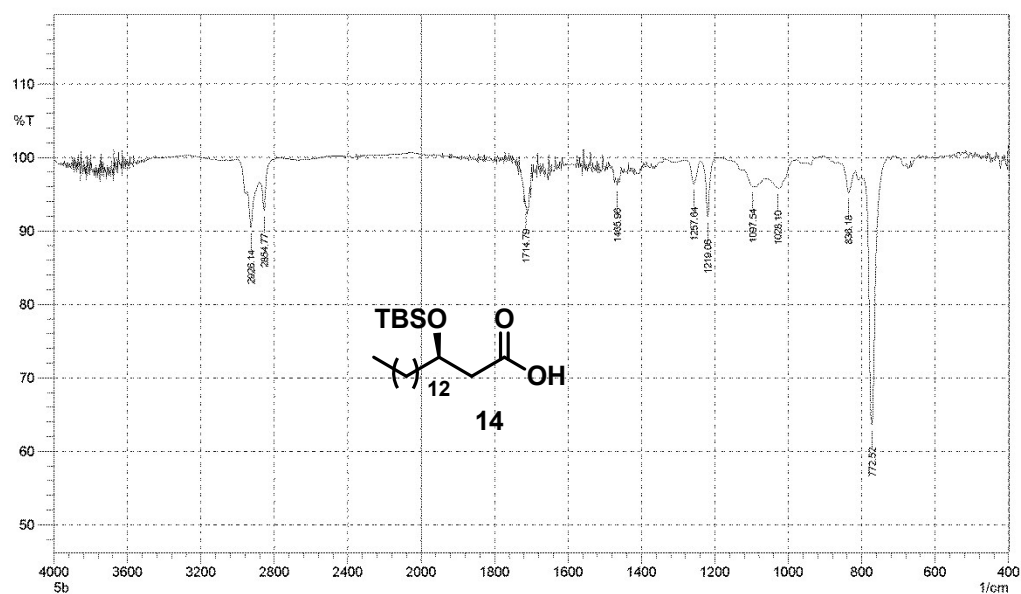

## Compound 4:

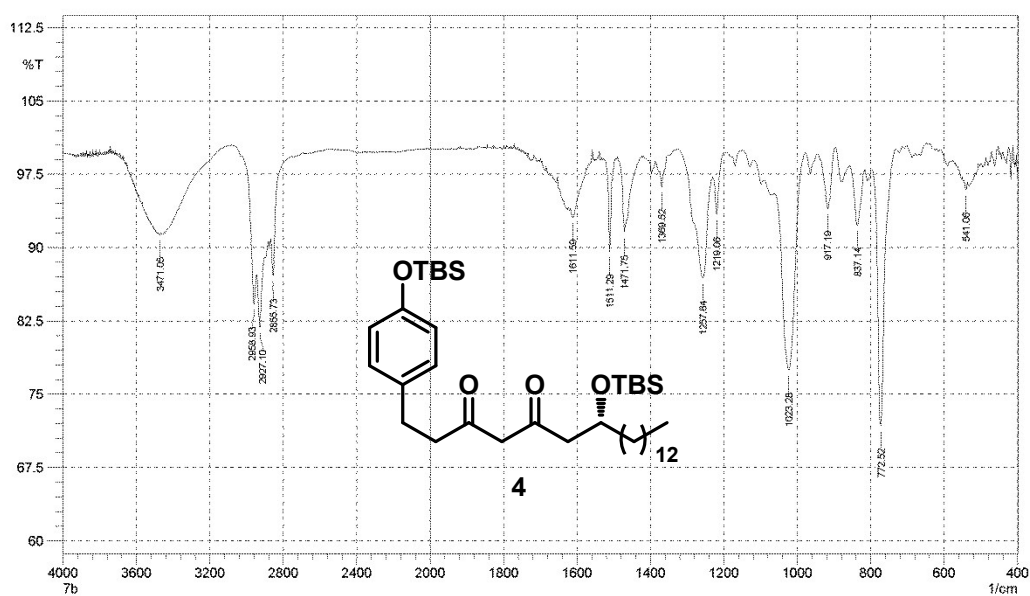

### Compound 3:

SHIMADZU

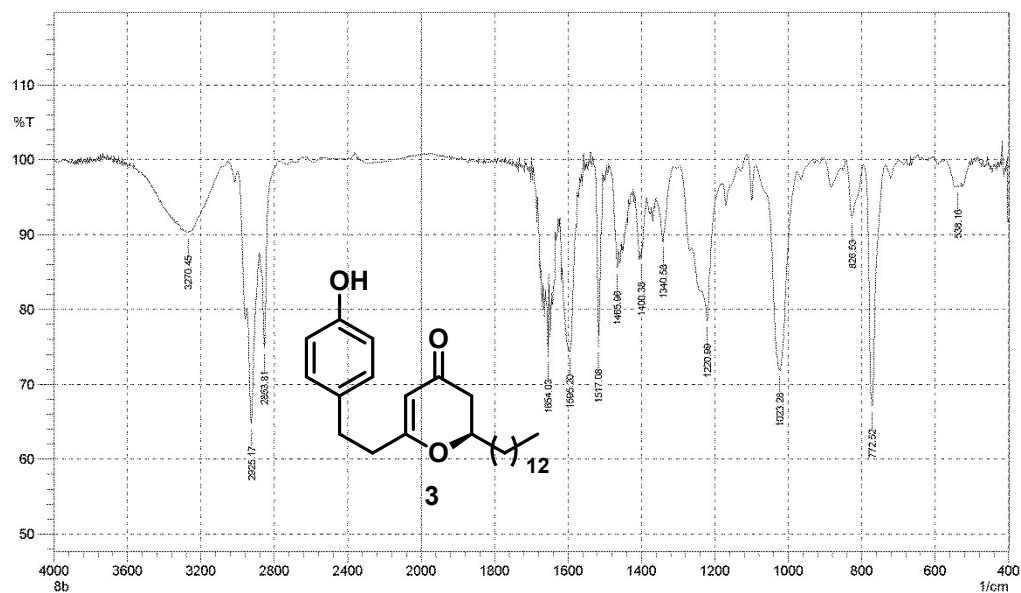

注释:  
8b

扫描次数:  
分辨率:

日期/时间: 2016-7-13 15:21:33  
用户名: Administrator

### Compound 1:

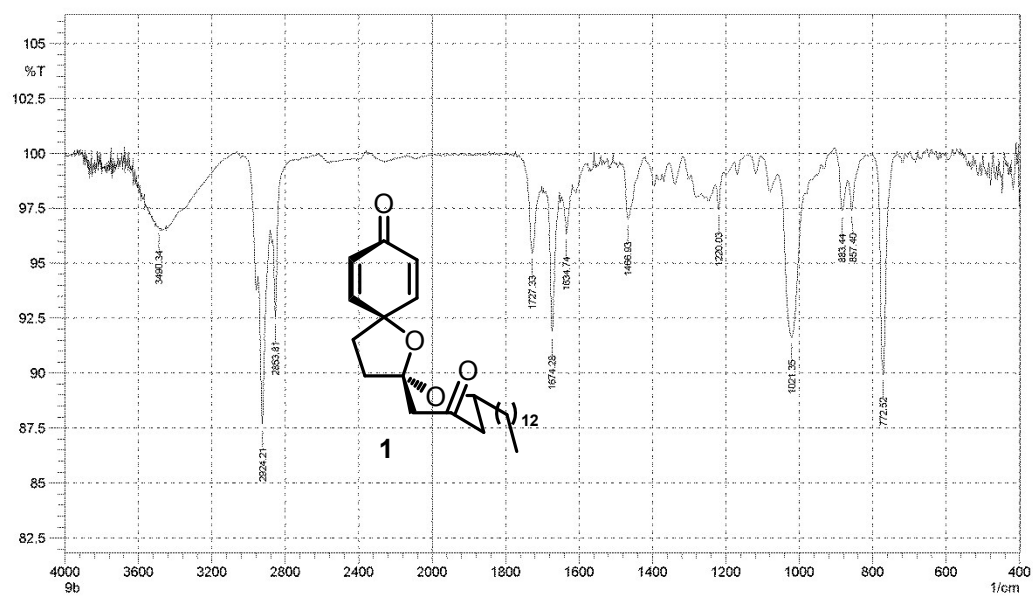

注释:  
9b

扫描次数:  
分辨率:

日期/时间: 2016-7-13 15:35:53  
用户名: Administrator

Aculeatin A:

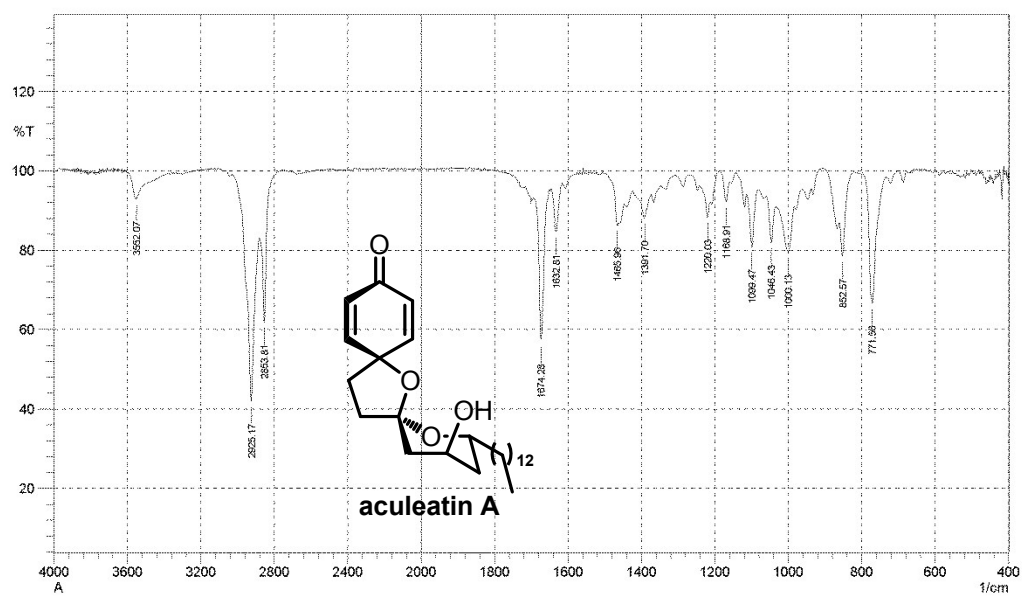

注释:  
A

扫描次数:  
分辨率:

日期/时间: 2016-7-13 15:45:24  
用户名: Administrator

HRMS spectra:

Compound 7:

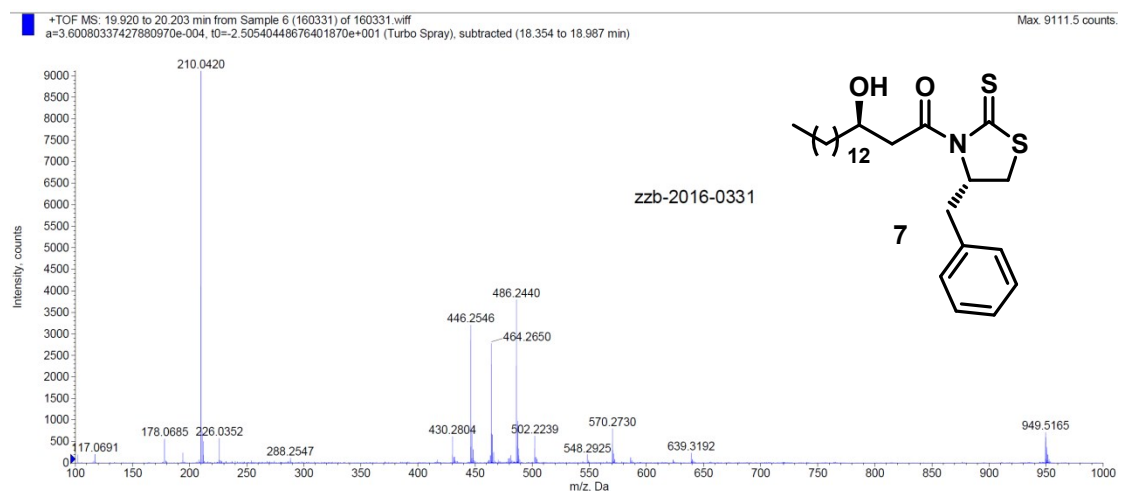

Compound 8:

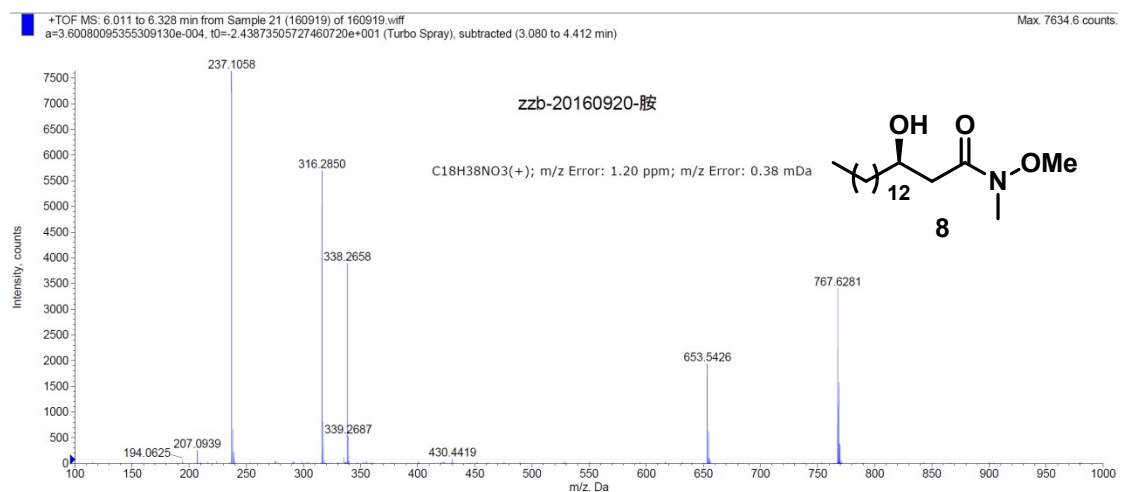

Compound 9:

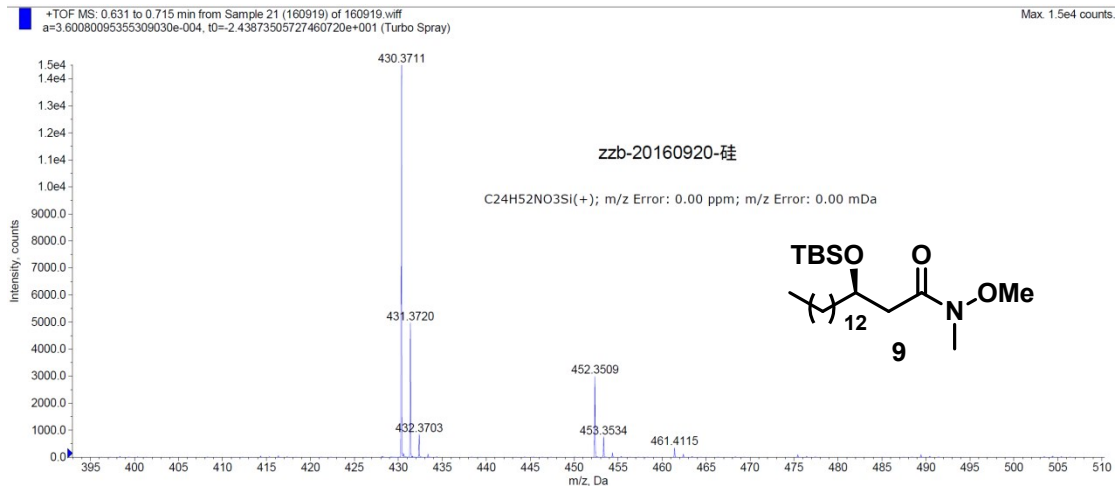

### Compound 11:

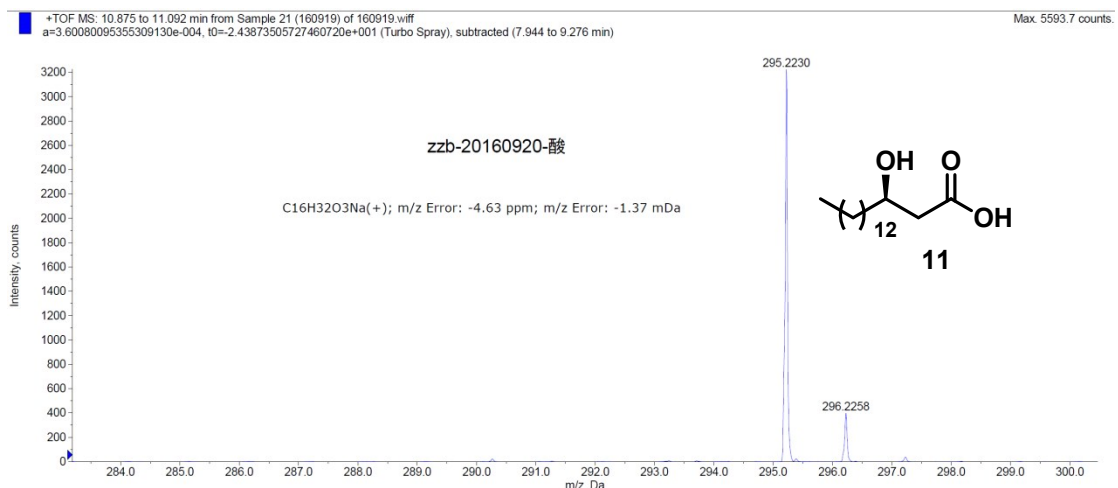

### Compound 13:

+TOF MS: 45.188 to 45.305 min from Sample 1 (160411) of 160411.wiff  
a=3.60082630936214690e-004, t0=-2.51713616771739910e+001 (Turbo Spray), subtracted (44.206 to 44.422 min) Max: 4015.1 counts.

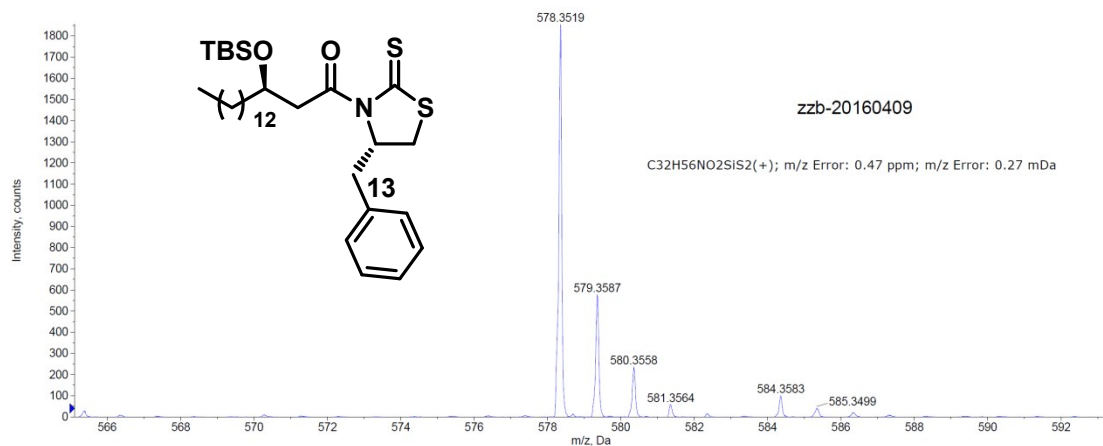

### Compound 14:

+TOF MS: 14.223 to 14.357 min from Sample 5 (160411) of 160411.wiff  
a=3.60084629312317520e-004, t0=-2.49553445533019840e+001 (Turbo Spray), subtracted (10.642 to 11.092 min) Max: 5277.6 counts.

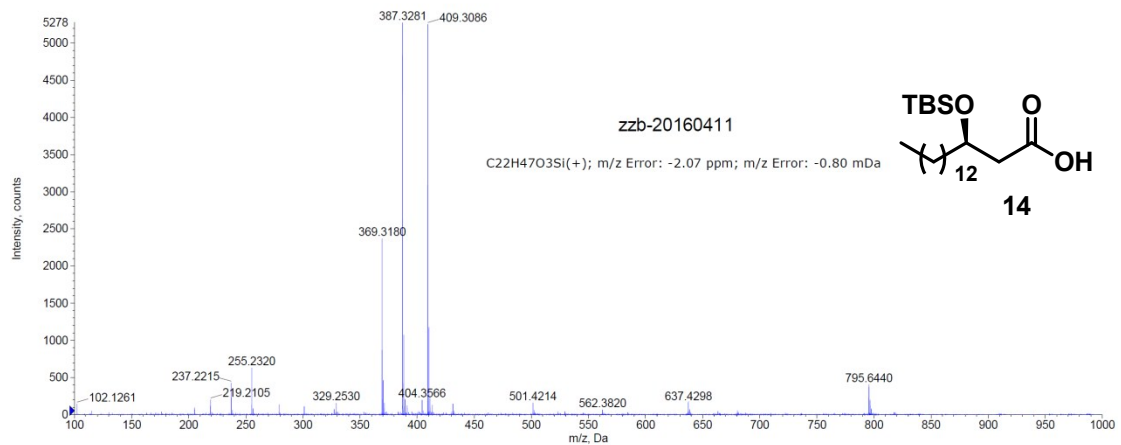

### Compound 4:



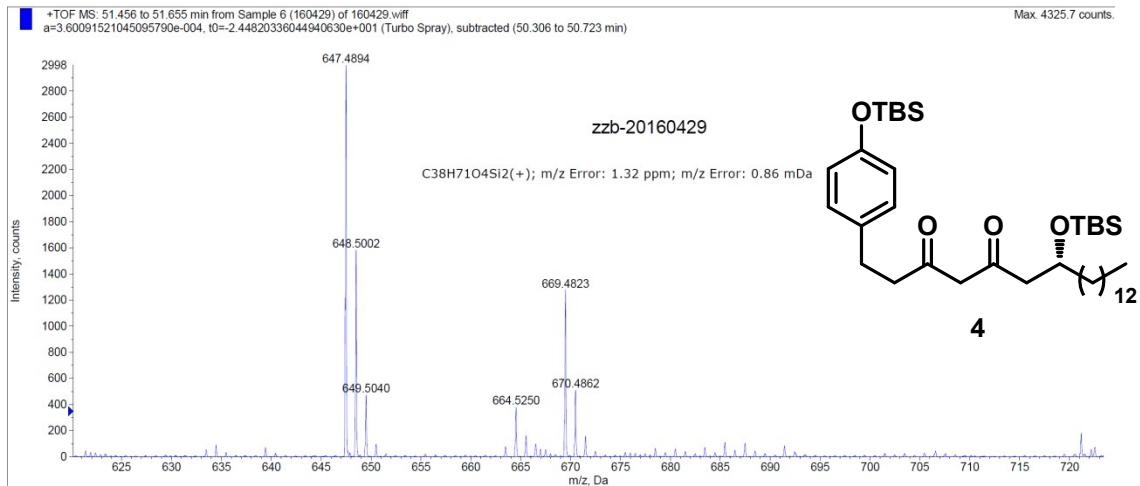

### Compound 3:

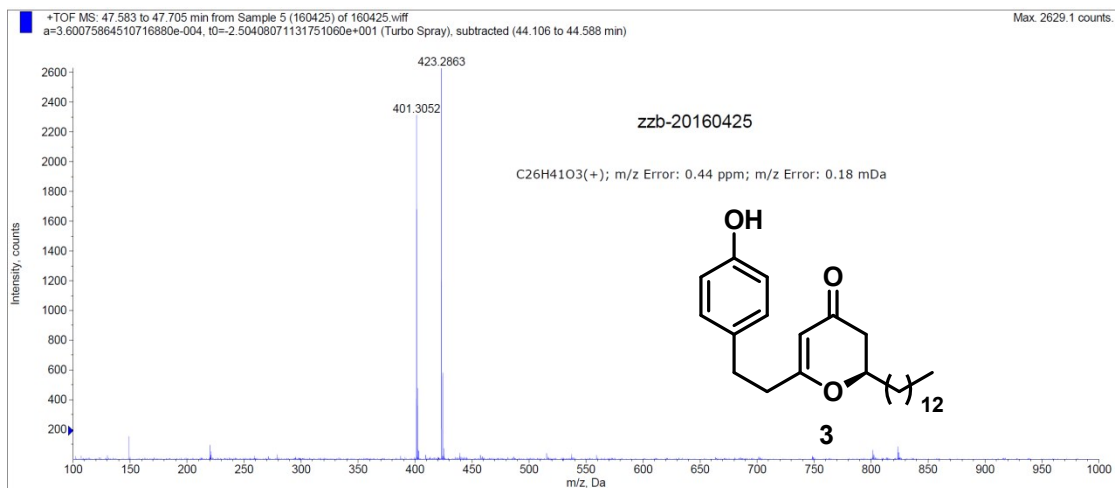

### Compound 1:

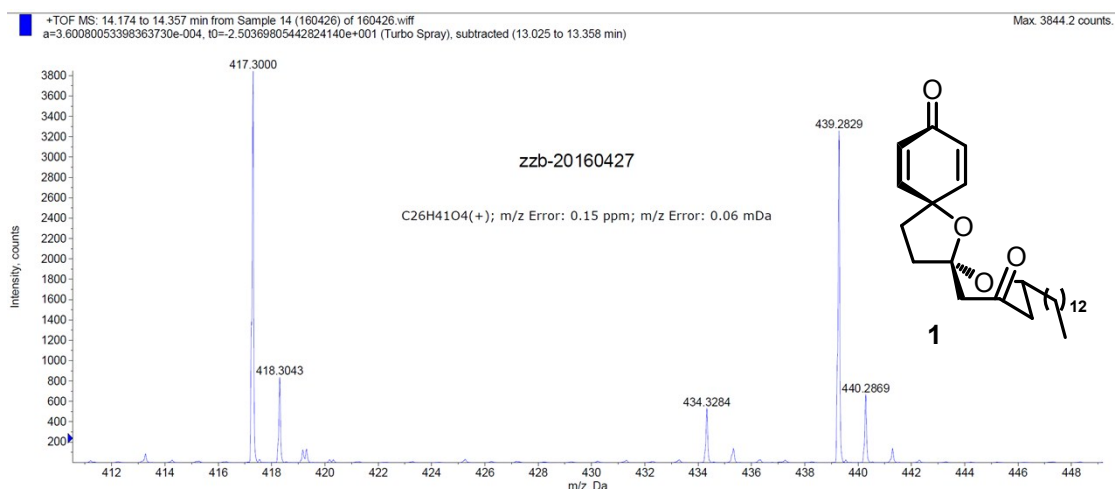

# Aculeatin A:

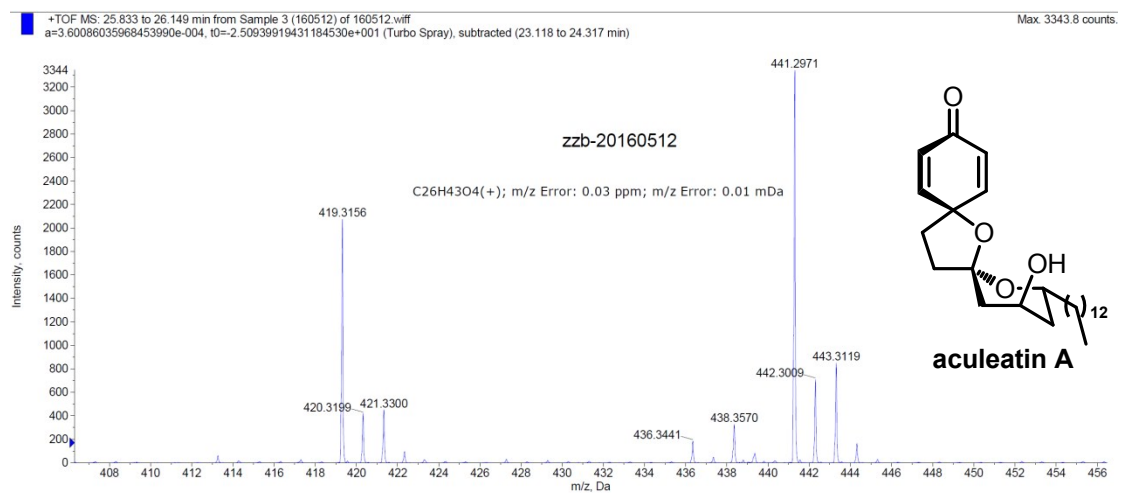

Supplement: c6ra27140e1.pdf [file c6ra27140e1.pdf]
